# Supplementary material for: Sulfoniumcalixpyrrole: the decoration of a calix[4]pyrrole host with positive charges boosts affinity and selectivity of anion binding in DMSO solvent
Source: Royal Society of Chemistry journal article supplement (doi:10.1039/b617465e), 2007-01-01

=====

S U P P L E M E N T A R Y   M A T E R I A L

=====

## Sulfoniumcalixpyrrole: The decoration of a calix[4]pyrrole host with positive charges boosts affinity and selectivity of anion binding in DMSO solvent

Martin Valik, Vladimír Král, Eberhardt Herdtweck, and Franz P. Schmidtchen

C o n t e n t s

=====

- Table S1** - Crystal Data and Details of the Structure Determination for: **Compound 6**
- Table S2** - Final Coordinates and Equivalent Isotropic Thermal Parameters of the non-Hydrogen atoms for: **Compound 6**
- Table S3** - Hydrogen Atom Positions and Isotropic Thermal Parameters for: **Compound 6**
- Table S4** - (An)isotropic Thermal Parameters for: **Compound 6**
- Table S5** - Bond Distances (Å) for: **Compound 6**
- Table S6** - Bond Angles (Degrees) for: **Compound 6**

Molecular structure of the thiopyrano calixpyrrole (**6**)

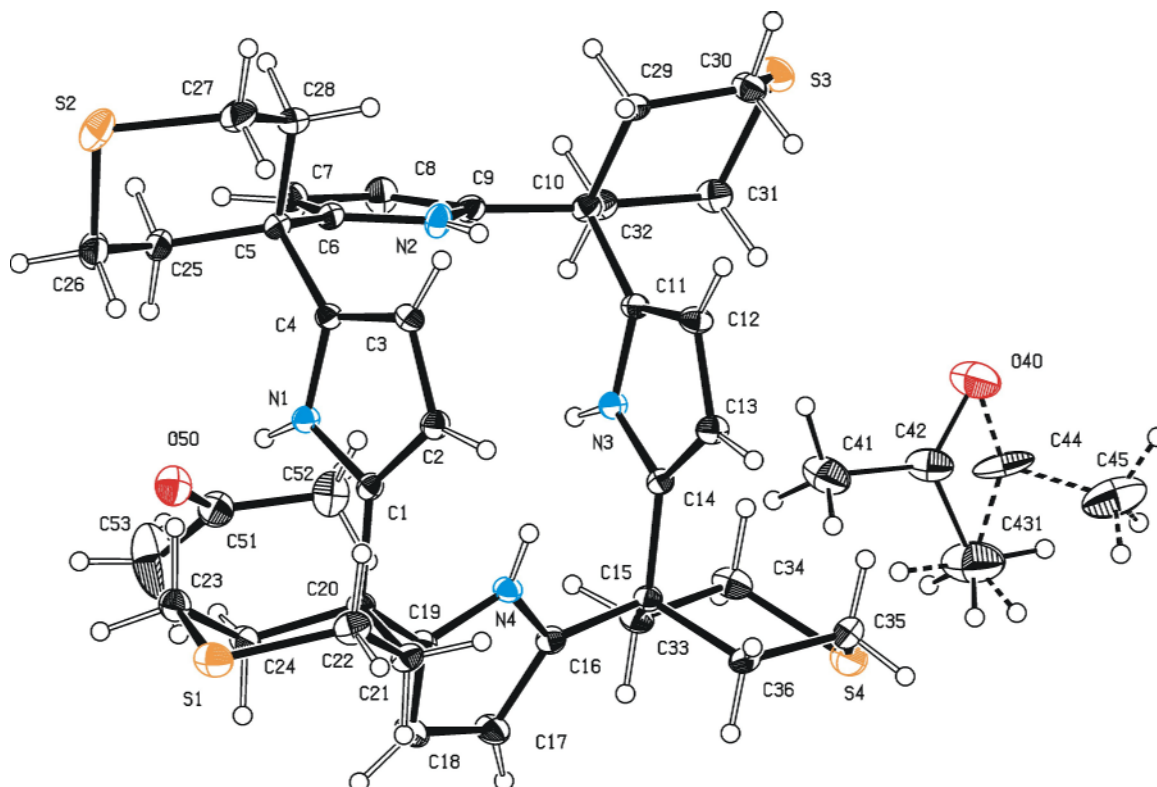

**Table S1** - Crystal Data and Details of the Structure Determination  
 for: **Compound 6**

Crystal Data

|                              |                                                                                                    |             |             |
|------------------------------|----------------------------------------------------------------------------------------------------|-------------|-------------|
| Formula                      | C <sub>36</sub> H <sub>44</sub> N <sub>4</sub> S <sub>4</sub> , 2(C <sub>3</sub> H <sub>6</sub> O) |             |             |
| Formula Weight               | 777.19                                                                                             |             |             |
| Crystal System               | Orthorhombic                                                                                       |             |             |
| Space group                  | Pbca (No. 61)                                                                                      |             |             |
| a, b, c [Angstrom]           | 16.0948 (1)                                                                                        | 26.2675 (1) | 19.2980 (1) |
| V [Ang <sup>3</sup> ]        | 8158.62 (7)                                                                                        |             |             |
| Z                            | 8                                                                                                  |             |             |
| D(calc) [g/cm <sup>3</sup> ] | 1.265                                                                                              |             |             |
| Mu(MoKa) [ /mm ]             | 0.274                                                                                              |             |             |
| F(000)                       | 3328                                                                                               |             |             |
| Crystal Size [mm]            | 0.25 x                                                                                             | 0.30 x      | 0.33        |

Data Collection

|                                  |                             |         |       |
|----------------------------------|-----------------------------|---------|-------|
| Temperature (K)                  | 173                         |         |       |
| Radiation [Angstrom]             | MoKa                        | 0.71073 |       |
| Theta Min-Max [Deg]              | 1.5, 25.4                   |         |       |
| Dataset                          | -19: 19 ; -31: 31 ; -23: 23 |         |       |
| Tot., Uniq. Data, R(int)         | 152651,                     | 7476,   | 0.044 |
| Observed data [I > 2.0 sigma(I)] | 6473                        |         |       |

Refinement

|                                                                    |                      |  |  |
|--------------------------------------------------------------------|----------------------|--|--|
| Nref, Npar                                                         | 7476, 670            |  |  |
| R, wR2, S                                                          | 0.0354, 0.0908, 1.02 |  |  |
| w = 1/[\S^2^(FO^2^)+(0.0424P)^2^+5.4301P] WHERE P=(FO^2^+2FC^2^)/3 |                      |  |  |
| Max. and Av. Shift/Error                                           | 0.08, 0.00           |  |  |
| Min. and Max. Resd. Dens. [e/Ang <sup>3</sup> ]                    | -0.45, 0.39          |  |  |

**Table S2** - Final Coordinates and Equivalent Isotropic Thermal  
 Parameters of the non-Hydrogen atoms for **Compound 6**

| Atom | x            | y           | z           | U(eq) [Ang <sup>2</sup> ] |
|------|--------------|-------------|-------------|---------------------------|
| ---- | ---          | ---         | ---         | -----                     |
| S1   | 0.19061 (3)  | 0.38997 (2) | 0.07074 (2) | 0.0354 (2)                |
| S2   | 0.04394 (3)  | 0.56831 (2) | 0.31661 (3) | 0.0431 (2)                |
| S3   | 0.21236 (3)  | 0.32264 (2) | 0.74461 (2) | 0.0353 (2)                |
| S4   | 0.46284 (3)  | 0.15612 (2) | 0.51091 (3) | 0.0404 (2)                |
| N1   | 0.21644 (8)  | 0.41988 (5) | 0.30271 (7) | 0.0200 (4)                |
| N2   | 0.19176 (9)  | 0.41791 (5) | 0.48609 (7) | 0.0251 (4)                |
| N3   | 0.31952 (8)  | 0.30798 (5) | 0.50621 (7) | 0.0206 (4)                |
| N4   | 0.31256 (8)  | 0.30017 (5) | 0.32311 (7) | 0.0212 (4)                |
| C1   | 0.20181 (9)  | 0.37438 (6) | 0.26937 (8) | 0.0200 (4)                |
| C2   | 0.12495 (10) | 0.35807 (6) | 0.29020 (8) | 0.0243 (5)                |
| C3   | 0.09219 (10) | 0.39482 (6) | 0.33676 (9) | 0.0249 (5)                |
| C4   | 0.14990 (10) | 0.43279 (6) | 0.34351 (8) | 0.0205 (4)                |
| C5   | 0.15313 (10) | 0.47847 (6) | 0.39154 (8) | 0.0231 (4)                |
| C6   | 0.20409 (10) | 0.46392 (6) | 0.45412 (8) | 0.0240 (5)                |
| C7   | 0.26473 (12) | 0.48841 (7) | 0.49085 (9) | 0.0322 (6)                |
| C8   | 0.28905 (12) | 0.45629 (7) | 0.54638 (9) | 0.0313 (5)                |
| C9   | 0.24326 (10) | 0.41268 (6) | 0.54233 (8) | 0.0236 (5)                |
| C10  | 0.23791 (10) | 0.36530 (6) | 0.58663 (8) | 0.0219 (5)                |
| C11  | 0.24589 (10) | 0.31952 (6) | 0.53913 (7) | 0.0198 (4)                |
| C12  | 0.18792 (10) | 0.28611 (6) | 0.51499 (8) | 0.0244 (5)                |
| C13  | 0.22700 (10) | 0.25305 (6) | 0.46690 (9) | 0.0250 (5)                |
| C14  | 0.30896 (9)  | 0.26715 (6) | 0.46212 (8) | 0.0196 (4)                |
| C15  | 0.37827 (9)  | 0.24646 (6) | 0.41711 (8) | 0.0203 (4)                |
| C16  | 0.38036 (9)  | 0.27485 (6) | 0.34848 (8) | 0.0220 (5)                |

**Table S2 (cont.)** - Final Coordinates and Equivalent Isotropic Thermal Parameters of the non-Hydrogen atoms for **Compound 6**

| Atom  | x             | y            | z            | U(eq) [Ang <sup>2</sup> ] |
|-------|---------------|--------------|--------------|---------------------------|
| ----  | ---           | ---          | ---          | -----                     |
| C17   | 0.44168 (11)  | 0.27954 (7)  | 0.29962 (9)  | 0.0302 (5)                |
| C18   | 0.40950 (11)  | 0.30879 (7)  | 0.24376 (9)  | 0.0305 (5)                |
| C19   | 0.32922 (10)  | 0.32136 (6)  | 0.25961 (8)  | 0.0220 (5)                |
| C20   | 0.26408 (9)   | 0.35123 (6)  | 0.21958 (8)  | 0.0209 (4)                |
| C21   | 0.21856 (11)  | 0.31435 (6)  | 0.16963 (9)  | 0.0261 (5)                |
| C22   | 0.15191 (12)  | 0.33892 (7)  | 0.12469 (9)  | 0.0308 (5)                |
| C23   | 0.24928 (12)  | 0.42552 (7)  | 0.13450 (9)  | 0.0309 (5)                |
| C24   | 0.30824 (10)  | 0.39266 (7)  | 0.17640 (9)  | 0.0247 (5)                |
| C25   | 0.19424 (12)  | 0.52493 (6)  | 0.35680 (9)  | 0.0276 (5)                |
| C26   | 0.14713 (13)  | 0.54584 (7)  | 0.29512 (10) | 0.0356 (6)                |
| C27   | 0.00608 (12)  | 0.51153 (7)  | 0.35936 (11) | 0.0372 (6)                |
| C28   | 0.06402 (11)  | 0.49276 (7)  | 0.41598 (9)  | 0.0302 (5)                |
| C29   | 0.15229 (11)  | 0.36596 (6)  | 0.62302 (9)  | 0.0254 (5)                |
| C30   | 0.13758 (11)  | 0.32323 (7)  | 0.67453 (9)  | 0.0294 (5)                |
| C31   | 0.30531 (11)  | 0.32243 (7)  | 0.69199 (9)  | 0.0305 (5)                |
| C32   | 0.30779 (11)  | 0.36655 (7)  | 0.64103 (9)  | 0.0269 (5)                |
| C33   | 0.46288 (10)  | 0.25285 (7)  | 0.45384 (9)  | 0.0253 (5)                |
| C34   | 0.46831 (11)  | 0.22421 (8)  | 0.52236 (9)  | 0.0326 (6)                |
| C35   | 0.36536 (12)  | 0.15473 (7)  | 0.46439 (10) | 0.0328 (6)                |
| C36   | 0.36383 (11)  | 0.18927 (6)  | 0.40138 (9)  | 0.0259 (5)                |
| O40   | -0.00829 (10) | 0.13958 (7)  | 0.45377 (8)  | 0.0556 (5)                |
| *C41  | 0.02548 (16)  | 0.17709 (11) | 0.34568 (13) | 0.0527 (9)                |
| *C42  | 0.03594 (15)  | 0.13891 (13) | 0.40192 (14) | 0.0416 (8)                |
| *C431 | 0.10101 (19)  | 0.10054 (13) | 0.39128 (15) | 0.0792 (11)               |
| *C432 | 0.10101 (19)  | 0.10054 (13) | 0.39128 (15) | 0.0792 (11)               |
| *C44  | 0.0361 (10)   | 0.1090 (9)   | 0.4321 (12)  | 0.053 (7)                 |
| *C45  | 0.0265 (14)   | 0.0544 (8)   | 0.4467 (12)  | 0.078 (9)                 |
| O50   | 0.38098 (8)   | 0.46986 (5)  | 0.30942 (7)  | 0.0374 (4)                |
| C51   | 0.43441 (11)  | 0.45082 (7)  | 0.34502 (10) | 0.0350 (6)                |
| C52   | 0.41794 (14)  | 0.40695 (8)  | 0.39165 (11) | 0.0456 (7)                |
| C53   | 0.52168 (15)  | 0.46926 (13) | 0.33959 (19) | 0.0933 (15)               |

U(eq) = 1/3 of the trace of the orthogonalized U Tensor

Starred Atom sites have a S.O.F less than 1.0

**Table S3** - Hydrogen Atom Positions and Isotropic Thermal Parameters for **Compound 6**

| Atom | x           | y          | z           | U(iso) [Ang <sup>2</sup> ] |
|------|-------------|------------|-------------|----------------------------|
| ---- | ---         | ---        | ---         | -----                      |
| H1   | 0.2620 (13) | 0.4356 (8) | 0.3021 (10) | 0.033 (5)                  |
| H2   | 0.1610 (12) | 0.3955 (8) | 0.4730 (10) | 0.032 (5)                  |
| H3   | 0.3657 (12) | 0.3243 (7) | 0.5128 (9)  | 0.026 (5)                  |
| H4   | 0.2686 (12) | 0.3030 (7) | 0.3439 (10) | 0.029 (5)                  |
| H21  | 0.0969 (11) | 0.3281 (7) | 0.2739 (9)  | 0.026 (4)                  |
| H31  | 0.0419 (12) | 0.3930 (7) | 0.3589 (10) | 0.028 (5)                  |
| H71  | 0.2868 (12) | 0.5206 (8) | 0.4796 (10) | 0.037 (5)                  |
| H81  | 0.3296 (13) | 0.4628 (8) | 0.5801 (11) | 0.041 (6)                  |
| H121 | 0.1318 (13) | 0.2848 (7) | 0.5279 (10) | 0.034 (5)                  |
| H131 | 0.2011 (11) | 0.2259 (7) | 0.4440 (9)  | 0.029 (5)                  |
| H171 | 0.4959 (13) | 0.2656 (8) | 0.3026 (10) | 0.041 (5)                  |
| H181 | 0.4372 (13) | 0.3189 (8) | 0.2037 (11) | 0.042 (6)                  |
| H211 | 0.2613 (12) | 0.2985 (7) | 0.1398 (9)  | 0.030 (5)                  |
| H212 | 0.1950 (11) | 0.2865 (7) | 0.1960 (9)  | 0.025 (4)                  |

**Table S3 (cont.)** - Hydrogen Atom Positions and Isotropic Thermal Parameters for **Compound 6**

| Atom  | x            | y          | z           | U(iso) [Ang <sup>2</sup> ] |
|-------|--------------|------------|-------------|----------------------------|
| ----  | ---          | ---        | ---         | -----                      |
| H221  | 0.1061 (12)  | 0.3513 (7) | 0.1530 (9)  | 0.028 (5)                  |
| H222  | 0.1299 (13)  | 0.3153 (8) | 0.0924 (11) | 0.044 (6)                  |
| H231  | 0.2816 (13)  | 0.4515 (8) | 0.1064 (11) | 0.044 (6)                  |
| H232  | 0.2088 (12)  | 0.4431 (7) | 0.1649 (10) | 0.030 (5)                  |
| H241  | 0.3419 (11)  | 0.4140 (7) | 0.2077 (9)  | 0.027 (5)                  |
| H242  | 0.3455 (11)  | 0.3764 (6) | 0.1447 (9)  | 0.024 (4)                  |
| H251  | 0.1981 (11)  | 0.5506 (7) | 0.3924 (9)  | 0.027 (5)                  |
| H252  | 0.2513 (12)  | 0.5159 (7) | 0.3425 (9)  | 0.030 (5)                  |
| H261  | 0.1437 (12)  | 0.5208 (8) | 0.2590 (11) | 0.040 (5)                  |
| H262  | 0.1771 (13)  | 0.5752 (8) | 0.2753 (10) | 0.042 (6)                  |
| H271  | -0.0037 (12) | 0.4853 (8) | 0.3241 (10) | 0.036 (5)                  |
| H272  | -0.0463 (14) | 0.5213 (8) | 0.3780 (11) | 0.045 (6)                  |
| H281  | 0.0380 (12)  | 0.4631 (8) | 0.4398 (10) | 0.034 (5)                  |
| H282  | 0.0700 (12)  | 0.5200 (8) | 0.4522 (10) | 0.035 (5)                  |
| H291  | 0.1485 (11)  | 0.3983 (7) | 0.6472 (10) | 0.029 (5)                  |
| H292  | 0.1074 (11)  | 0.3653 (7) | 0.5887 (9)  | 0.024 (4)                  |
| H301  | 0.1399 (11)  | 0.2904 (7) | 0.6522 (10) | 0.030 (5)                  |
| H302  | 0.0832 (13)  | 0.3269 (7) | 0.6968 (10) | 0.036 (5)                  |
| H311  | 0.3498 (13)  | 0.3253 (8) | 0.7242 (11) | 0.040 (5)                  |
| H312  | 0.3092 (12)  | 0.2888 (8) | 0.6672 (10) | 0.038 (5)                  |
| H321  | 0.3025 (11)  | 0.3976 (7) | 0.6659 (9)  | 0.026 (5)                  |
| H322  | 0.3625 (12)  | 0.3671 (7) | 0.6167 (10) | 0.032 (5)                  |
| H331  | 0.5073 (11)  | 0.2410 (6) | 0.4236 (9)  | 0.021 (4)                  |
| H332  | 0.4755 (11)  | 0.2893 (7) | 0.4613 (9)  | 0.028 (5)                  |
| H341  | 0.5220 (13)  | 0.2306 (7) | 0.5437 (10) | 0.036 (5)                  |
| H342  | 0.4238 (12)  | 0.2353 (7) | 0.5536 (10) | 0.032 (5)                  |
| H351  | 0.3210 (12)  | 0.1639 (7) | 0.4960 (10) | 0.035 (5)                  |
| H352  | 0.3587 (14)  | 0.1193 (9) | 0.4510 (11) | 0.050 (6)                  |
| H361  | 0.4054 (11)  | 0.1788 (6) | 0.3692 (9)  | 0.025 (4)                  |
| H362  | 0.3102 (12)  | 0.1850 (7) | 0.3783 (10) | 0.030 (5)                  |
| *H413 | 0.0772       | 0.1963     | 0.3400      | 0.0790                     |
| *H432 | 0.1556       | 0.1170     | 0.3927      | 0.1190                     |
| *H433 | 0.0932       | 0.0842     | 0.3461      | 0.1190                     |
| *H431 | 0.0977       | 0.0748     | 0.4279      | 0.1190                     |
| *H411 | -0.0197      | 0.2005     | 0.3578      | 0.0790                     |
| *H412 | 0.0120       | 0.1596     | 0.3022      | 0.0790                     |
| *H434 | 0.0931       | 0.0684     | 0.3664      | 0.1190                     |
| *H435 | 0.1516       | 0.0985     | 0.4194      | 0.1190                     |
| *H436 | 0.1063       | 0.1284     | 0.3578      | 0.1190                     |
| *H451 | 0.0759       | 0.0419     | 0.4709      | 0.1170                     |
| *H452 | 0.0196       | 0.0358     | 0.4031      | 0.1170                     |
| *H453 | -0.0226      | 0.0491     | 0.4759      | 0.1170                     |
| H521  | 0.3585       | 0.4056     | 0.4027      | 0.0680                     |
| H522  | 0.4499       | 0.4110     | 0.4345      | 0.0680                     |
| H523  | 0.4345       | 0.3753     | 0.3685      | 0.0680                     |
| H531  | 0.5427       | 0.4775     | 0.3859      | 0.1400                     |
| H532  | 0.5234       | 0.4998     | 0.3104      | 0.1400                     |
| H533  | 0.5563       | 0.4426     | 0.3188      | 0.1400                     |

=====  
 The Temperature Factor has the Form of  $\text{Exp}(-T)$  Where  
 $T = 8 * (\text{Pi} ** 2) * U * (\text{Sin}(\text{Theta}) / \text{Lambda}) ** 2$  for Isotropic Atoms

Starred Atom sites have a S.O.F less than 1.0

**Table S4** - (An)isotropic Thermal Parameters for **Compound 6**

| Atom | U(1,1) or U | U(2,2)      | U(3,3)      | U(2,3)       | U(1,3)       | U(1,2)       |
|------|-------------|-------------|-------------|--------------|--------------|--------------|
| ---- | -----       | -----       | -----       | -----        | -----        | -----        |
| S1   | 0.0380 (3)  | 0.0453 (3)  | 0.0229 (2)  | 0.0030 (2)   | -0.0030 (2)  | 0.0093 (2)   |
| S2   | 0.0528 (3)  | 0.0271 (2)  | 0.0495 (3)  | 0.0048 (2)   | -0.0087 (2)  | 0.0104 (2)   |
| S3   | 0.0410 (3)  | 0.0452 (3)  | 0.0197 (2)  | 0.0033 (2)   | -0.0003 (2)  | 0.0052 (2)   |
| S4   | 0.0408 (3)  | 0.0443 (3)  | 0.0360 (3)  | 0.0140 (2)   | 0.0044 (2)   | 0.0180 (2)   |
| N1   | 0.0189 (7)  | 0.0195 (7)  | 0.0215 (7)  | -0.0018 (5)  | 0.0001 (5)   | -0.0011 (6)  |
| N2   | 0.0319 (8)  | 0.0186 (7)  | 0.0247 (7)  | -0.0008 (6)  | -0.0046 (6)  | -0.0048 (6)  |
| N3   | 0.0183 (7)  | 0.0206 (7)  | 0.0229 (7)  | -0.0025 (5)  | 0.0001 (5)   | -0.0022 (6)  |
| N4   | 0.0174 (7)  | 0.0239 (7)  | 0.0222 (7)  | 0.0003 (5)   | 0.0026 (5)   | 0.0028 (6)   |
| C1   | 0.0212 (8)  | 0.0188 (7)  | 0.0200 (8)  | 0.0002 (6)   | -0.0021 (6)  | 0.0014 (6)   |
| C2   | 0.0233 (8)  | 0.0219 (8)  | 0.0276 (8)  | -0.0037 (7)  | 0.0010 (7)   | -0.0037 (7)  |
| C3   | 0.0214 (8)  | 0.0261 (8)  | 0.0273 (8)  | 0.0002 (7)   | 0.0059 (7)   | -0.0011 (7)  |
| C4   | 0.0235 (8)  | 0.0201 (7)  | 0.0179 (7)  | 0.0008 (6)   | 0.0012 (6)   | 0.0027 (6)   |
| C5   | 0.0285 (8)  | 0.0184 (7)  | 0.0224 (8)  | -0.0013 (6)  | 0.0033 (7)   | 0.0022 (7)   |
| C6   | 0.0317 (9)  | 0.0188 (8)  | 0.0214 (8)  | -0.0022 (6)  | 0.0043 (7)   | 0.0008 (7)   |
| C7   | 0.0449 (11) | 0.0238 (9)  | 0.0278 (9)  | -0.0014 (7)  | -0.0005 (8)  | -0.0093 (8)  |
| C8   | 0.0386 (10) | 0.0298 (9)  | 0.0255 (9)  | -0.0033 (7)  | -0.0063 (8)  | -0.0073 (8)  |
| C9   | 0.0290 (8)  | 0.0230 (8)  | 0.0189 (8)  | -0.0036 (6)  | -0.0006 (7)  | 0.0019 (7)   |
| C10  | 0.0242 (8)  | 0.0218 (8)  | 0.0196 (8)  | -0.0022 (6)  | -0.0026 (6)  | 0.0021 (6)   |
| C11  | 0.0202 (7)  | 0.0219 (8)  | 0.0172 (7)  | 0.0002 (6)   | 0.0005 (6)   | 0.0038 (6)   |
| C12  | 0.0165 (8)  | 0.0308 (9)  | 0.0259 (8)  | -0.0049 (7)  | 0.0017 (6)   | -0.0005 (7)  |
| C13  | 0.0212 (8)  | 0.0262 (8)  | 0.0275 (8)  | -0.0070 (7)  | 0.0000 (7)   | -0.0034 (7)  |
| C14  | 0.0201 (8)  | 0.0191 (7)  | 0.0195 (7)  | -0.0014 (6)  | -0.0008 (6)  | 0.0008 (6)   |
| C15  | 0.0177 (7)  | 0.0224 (8)  | 0.0209 (7)  | -0.0004 (6)  | 0.0006 (6)   | 0.0015 (6)   |
| C16  | 0.0198 (8)  | 0.0231 (8)  | 0.0231 (8)  | -0.0002 (6)  | -0.0015 (6)  | 0.0025 (6)   |
| C17  | 0.0213 (8)  | 0.0380 (10) | 0.0313 (9)  | 0.0066 (8)   | 0.0044 (7)   | 0.0089 (7)   |
| C18  | 0.0268 (9)  | 0.0400 (10) | 0.0248 (9)  | 0.0069 (8)   | 0.0061 (7)   | 0.0065 (8)   |
| C19  | 0.0230 (8)  | 0.0227 (8)  | 0.0203 (8)  | -0.0005 (6)  | 0.0011 (6)   | 0.0013 (6)   |
| C20  | 0.0204 (8)  | 0.0222 (8)  | 0.0202 (7)  | -0.0004 (6)  | 0.0004 (6)   | 0.0025 (6)   |
| C21  | 0.0303 (9)  | 0.0233 (8)  | 0.0248 (8)  | -0.0051 (7)  | -0.0012 (7)  | 0.0031 (7)   |
| C22  | 0.0313 (9)  | 0.0346 (10) | 0.0264 (9)  | -0.0054 (8)  | -0.0062 (8)  | 0.0016 (8)   |
| C23  | 0.0324 (9)  | 0.0313 (9)  | 0.0290 (9)  | 0.0049 (8)   | 0.0022 (8)   | 0.0044 (8)   |
| C24  | 0.0236 (8)  | 0.0284 (9)  | 0.0221 (8)  | 0.0014 (7)   | 0.0020 (7)   | 0.0023 (7)   |
| C25  | 0.0374 (10) | 0.0191 (8)  | 0.0262 (9)  | 0.0001 (7)   | 0.0024 (7)   | -0.0008 (7)  |
| C26  | 0.0495 (12) | 0.0260 (9)  | 0.0312 (10) | 0.0050 (8)   | 0.0008 (9)   | -0.0010 (9)  |
| C27  | 0.0337 (10) | 0.0316 (10) | 0.0464 (11) | -0.0009 (9)  | 0.0030 (9)   | 0.0100 (8)   |
| C28  | 0.0352 (10) | 0.0257 (9)  | 0.0296 (9)  | -0.0013 (7)  | 0.0094 (8)   | 0.0064 (8)   |
| C29  | 0.0271 (9)  | 0.0270 (9)  | 0.0220 (8)  | -0.0026 (7)  | 0.0012 (7)   | 0.0060 (7)   |
| C30  | 0.0291 (9)  | 0.0362 (10) | 0.0228 (8)  | 0.0016 (7)   | 0.0028 (7)   | 0.0040 (8)   |
| C31  | 0.0313 (9)  | 0.0360 (10) | 0.0243 (9)  | -0.0007 (8)  | -0.0048 (7)  | 0.0052 (8)   |
| C32  | 0.0304 (9)  | 0.0296 (9)  | 0.0207 (8)  | -0.0063 (7)  | -0.0042 (7)  | 0.0005 (7)   |
| C33  | 0.0168 (8)  | 0.0340 (10) | 0.0252 (8)  | -0.0001 (7)  | 0.0006 (7)   | 0.0022 (7)   |
| C34  | 0.0232 (9)  | 0.0498 (11) | 0.0247 (9)  | 0.0013 (8)   | -0.0019 (7)  | 0.0079 (8)   |
| C35  | 0.0396 (10) | 0.0231 (9)  | 0.0356 (10) | 0.0009 (8)   | 0.0053 (8)   | 0.0039 (8)   |
| C36  | 0.0293 (9)  | 0.0232 (8)  | 0.0251 (8)  | -0.0040 (7)  | 0.0031 (7)   | 0.0043 (7)   |
| O40  | 0.0521 (9)  | 0.0739 (11) | 0.0407 (8)  | -0.0014 (8)  | 0.0089 (7)   | 0.0138 (9)   |
| C41  | 0.0407 (14) | 0.0723 (19) | 0.0451 (15) | 0.0039 (13)  | 0.0107 (11)  | 0.0069 (13)  |
| C42  | 0.0322 (12) | 0.0592 (18) | 0.0335 (13) | -0.0090 (12) | -0.0020 (10) | 0.0085 (12)  |
| C431 | 0.0715 (18) | 0.103 (2)   | 0.0632 (17) | -0.0093 (16) | 0.0038 (15)  | 0.0365 (17)  |
| C432 | 0.0715 (18) | 0.103 (2)   | 0.0632 (17) | -0.0093 (16) | 0.0038 (15)  | 0.0365 (17)  |
| C44  | 0.034 (9)   | 0.068 (14)  | 0.058 (13)  | -0.036 (11)  | -0.010 (8)   | 0.031 (9)    |
| C45  | 0.075 (15)  | 0.075 (15)  | 0.084 (16)  | -0.042 (12)  | -0.006 (12)  | 0.017 (11)   |
| O50  | 0.0292 (7)  | 0.0387 (7)  | 0.0442 (7)  | 0.0032 (6)   | -0.0039 (6)  | -0.0031 (6)  |
| C51  | 0.0289 (9)  | 0.0353 (10) | 0.0407 (10) | 0.0002 (8)   | 0.0002 (8)   | 0.0002 (8)   |
| C52  | 0.0485 (12) | 0.0403 (11) | 0.0479 (12) | 0.0056 (9)   | -0.0063 (10) | -0.0041 (10) |
| C53  | 0.0350 (13) | 0.112 (3)   | 0.133 (3)   | 0.066 (2)    | -0.0216 (16) | -0.0191 (15) |

=====  
 The Temperature Factor has the Form of  $\text{Exp}(-T)$  Where  
 $T = 8*(\text{Pi}^{**2})*U*(\text{Sin}(\text{Theta})/\text{Lambda})^{**2}$  for Isotropic Atoms  
 $T = 2*(\text{Pi}^{**2})*\text{Sumij}(h(i)*h(j)*U(i,j)*\text{Astar}(i)*\text{Astar}(j))$ , for  
 Anisotropic Atoms. Astar(i) are Reciprocal Axial Lengths and  
 h(i) are the Reflection Indices.

**Table S5** - Bond Distances (Å) for **Compound 6**

|     |       |             |      |       |            |
|-----|-------|-------------|------|-------|------------|
| S1  | -C22  | 1.8083 (19) | C12  | -C13  | 1.418 (2)  |
| S1  | -C23  | 1.8104 (19) | C13  | -C14  | 1.373 (2)  |
| S2  | -C26  | 1.811 (2)   | C14  | -C15  | 1.515 (2)  |
| S2  | -C27  | 1.810 (2)   | C15  | -C33  | 1.544 (2)  |
| S3  | -C30  | 1.8105 (18) | C15  | -C36  | 1.550 (2)  |
| S3  | -C31  | 1.8081 (18) | C15  | -C16  | 1.520 (2)  |
| S4  | -C34  | 1.804 (2)   | C16  | -C17  | 1.371 (2)  |
| S4  | -C35  | 1.808 (2)   | C17  | -C18  | 1.421 (3)  |
| N1  | -C1   | 1.378 (2)   | C18  | -C19  | 1.368 (2)  |
| N1  | -C4   | 1.372 (2)   | C19  | -C20  | 1.520 (2)  |
| N2  | -C6   | 1.371 (2)   | C20  | -C21  | 1.551 (2)  |
| N2  | -C9   | 1.373 (2)   | C20  | -C24  | 1.544 (2)  |
| N3  | -C14  | 1.380 (2)   | C21  | -C22  | 1.523 (3)  |
| N3  | -C11  | 1.378 (2)   | C23  | -C24  | 1.516 (3)  |
| N4  | -C16  | 1.369 (2)   | C25  | -C26  | 1.514 (3)  |
| N4  | -C19  | 1.372 (2)   | C27  | -C28  | 1.519 (3)  |
| C1  | -C2   | 1.369 (2)   | C29  | -C30  | 1.518 (2)  |
| C1  | -C20  | 1.516 (2)   | C31  | -C32  | 1.520 (3)  |
| C2  | -C3   | 1.420 (2)   | C33  | -C34  | 1.524 (3)  |
| C3  | -C4   | 1.369 (2)   | C35  | -C36  | 1.517 (3)  |
| C4  | -C5   | 1.517 (2)   |      |       |            |
| C5  | -C28  | 1.556 (2)   | O40  | -C42  | 1.228 (3)  |
| C5  | -C25  | 1.542 (2)   | O40  | -C44  | 1.15 (2)   |
| C5  | -C6   | 1.509 (2)   | C41  | -C42  | 1.487 (4)  |
| C6  | -C7   | 1.367 (2)   | C42  | -C431 | 1.468 (4)  |
| C7  | -C8   | 1.419 (3)   | C44  | -C432 | 1.327 (19) |
| C8  | -C9   | 1.364 (2)   | C44  | -C45  | 1.47 (3)   |
| C9  | -C10  | 1.512 (2)   |      |       |            |
| C10 | -C29  | 1.547 (2)   | O50  | -C51  | 1.209 (2)  |
| C10 | -C11  | 1.518 (2)   | C51  | -C52  | 1.486 (3)  |
| C10 | -C32  | 1.539 (2)   | C51  | -C53  | 1.489 (3)  |
| C11 | -C12  | 1.363 (2)   |      |       |            |
| N1  | -H1   | 0.84 (2)    | C31  | -H311 | 0.95 (2)   |
| N2  | -H2   | 0.81 (2)    | C31  | -H312 | 1.01 (2)   |
| N3  | -H3   | 0.867 (19)  | C32  | -H322 | 0.998 (19) |
| N4  | -H4   | 0.817 (19)  | C32  | -H321 | 0.950 (18) |
| C2  | -H21  | 0.960 (18)  | C33  | -H331 | 0.974 (17) |
| C3  | -H31  | 0.917 (19)  | C33  | -H332 | 0.989 (18) |
| C7  | -H71  | 0.94 (2)    | C34  | -H342 | 0.981 (19) |
| C8  | -H81  | 0.94 (2)    | C34  | -H341 | 0.97 (2)   |
| C12 | -H121 | 0.94 (2)    | C35  | -H352 | 0.97 (2)   |
| C13 | -H131 | 0.937 (18)  | C35  | -H351 | 0.969 (19) |
| C17 | -H171 | 0.95 (2)    | C36  | -H362 | 0.978 (19) |
| C18 | -H181 | 0.93 (2)    | C36  | -H361 | 0.953 (17) |
| C21 | -H211 | 0.989 (19)  |      |       |            |
| C21 | -H212 | 0.968 (18)  | C41  | -H411 | 0.98       |
| C22 | -H221 | 0.974 (19)  | C41  | -H412 | 0.98       |
| C22 | -H222 | 0.95 (2)    | C41  | -H413 | 0.98       |
| C23 | -H231 | 1.02 (2)    | C431 | -H431 | 0.98       |
| C23 | -H232 | 0.991 (19)  | C431 | -H432 | 0.98       |
| C24 | -H241 | 0.986 (18)  | C431 | -H433 | 0.98       |
| C24 | -H242 | 0.957 (17)  | C432 | -H436 | 0.98       |
| C25 | -H251 | 0.965 (18)  | C432 | -H434 | 0.98       |
| C25 | -H252 | 0.988 (19)  | C432 | -H435 | 0.98       |
| C26 | -H261 | 0.96 (2)    | C45  | -H451 | 0.98       |
| C26 | -H262 | 0.99 (2)    | C45  | -H452 | 0.98       |
| C27 | -H272 | 0.95 (2)    | C45  | -H453 | 0.98       |
| C27 | -H271 | 0.98 (2)    |      |       |            |
| C28 | -H281 | 1.00 (2)    | C52  | -H523 | 0.98       |
| C28 | -H282 | 1.00 (2)    | C52  | -H522 | 0.98       |
| C29 | -H291 | 0.971 (19)  | C52  | -H521 | 0.98       |
| C29 | -H292 | 0.980 (18)  | C53  | -H532 | 0.98       |
| C30 | -H302 | 0.98 (2)    | C53  | -H531 | 0.98       |
| C30 | -H301 | 0.965 (19)  | C53  | -H533 | 0.98       |

**Table S6** - Bond Angles (Degrees) for **Compound 6**

|     |      |       |             |      |      |       |             |
|-----|------|-------|-------------|------|------|-------|-------------|
| C22 | -S1  | -C23  | 99.84 (8)   | C16  | -C15 | -C33  | 109.09 (12) |
| C26 | -S2  | -C27  | 98.32 (9)   | C16  | -C15 | -C36  | 107.94 (13) |
| C30 | -S3  | -C31  | 97.50 (8)   | C14  | -C15 | -C36  | 110.46 (13) |
| C34 | -S4  | -C35  | 97.08 (8)   | C33  | -C15 | -C36  | 109.11 (13) |
| C1  | -N1  | -C4   | 110.43 (13) | N4   | -C16 | -C17  | 106.52 (14) |
| C6  | -N2  | -C9   | 110.89 (13) | N4   | -C16 | -C15  | 122.17 (13) |
| C11 | -N3  | -C14  | 110.45 (12) | C15  | -C16 | -C17  | 131.25 (14) |
| C16 | -N4  | -C19  | 111.15 (13) | C16  | -C17 | -C18  | 107.94 (15) |
| N1  | -C1  | -C2   | 106.78 (13) | C17  | -C18 | -C19  | 107.76 (15) |
| C2  | -C1  | -C20  | 131.14 (14) | C18  | -C19 | -C20  | 131.46 (15) |
| N1  | -C1  | -C20  | 122.08 (13) | N4   | -C19 | -C18  | 106.63 (14) |
| C1  | -C2  | -C3   | 107.96 (14) | N4   | -C19 | -C20  | 121.89 (14) |
| C2  | -C3  | -C4   | 107.67 (14) | C1   | -C20 | -C21  | 109.41 (12) |
| N1  | -C4  | -C3   | 107.15 (14) | C1   | -C20 | -C24  | 111.33 (13) |
| C3  | -C4  | -C5   | 131.11 (15) | C19  | -C20 | -C21  | 108.62 (13) |
| N1  | -C4  | -C5   | 121.29 (14) | C19  | -C20 | -C24  | 108.69 (12) |
| C4  | -C5  | -C6   | 107.89 (13) | C21  | -C20 | -C24  | 108.80 (13) |
| C4  | -C5  | -C28  | 110.15 (13) | C1   | -C20 | -C19  | 109.93 (13) |
| C6  | -C5  | -C25  | 108.38 (13) | C20  | -C21 | -C22  | 114.96 (13) |
| C4  | -C5  | -C25  | 112.03 (13) | S1   | -C22 | -C21  | 113.55 (13) |
| C25 | -C5  | -C28  | 109.66 (14) | S1   | -C23 | -C24  | 113.28 (13) |
| C6  | -C5  | -C28  | 108.64 (13) | C20  | -C24 | -C23  | 113.64 (14) |
| N2  | -C6  | -C7   | 106.54 (14) | C5   | -C25 | -C26  | 114.46 (15) |
| C5  | -C6  | -C7   | 133.14 (15) | S2   | -C26 | -C25  | 113.42 (14) |
| N2  | -C6  | -C5   | 120.30 (14) | S2   | -C27 | -C28  | 112.87 (13) |
| C6  | -C7  | -C8   | 107.98 (16) | C5   | -C28 | -C27  | 115.23 (15) |
| C7  | -C8  | -C9   | 107.88 (16) | C10  | -C29 | -C30  | 115.34 (14) |
| N2  | -C9  | -C10  | 119.67 (14) | S3   | -C30 | -C29  | 113.07 (12) |
| C8  | -C9  | -C10  | 133.58 (15) | S3   | -C31 | -C32  | 112.50 (12) |
| N2  | -C9  | -C8   | 106.71 (14) | C10  | -C32 | -C31  | 113.94 (14) |
| C9  | -C10 | -C11  | 107.81 (12) | C15  | -C33 | -C34  | 113.28 (14) |
| C9  | -C10 | -C32  | 109.05 (13) | S4   | -C34 | -C33  | 112.35 (13) |
| C11 | -C10 | -C29  | 111.01 (13) | S4   | -C35 | -C36  | 113.57 (13) |
| C9  | -C10 | -C29  | 107.35 (13) | C15  | -C36 | -C35  | 114.84 (14) |
| C11 | -C10 | -C32  | 111.54 (13) |      |      |       |             |
| C29 | -C10 | -C32  | 109.95 (13) | O40  | -C42 | -C41  | 121.3 (3)   |
| N3  | -C11 | -C10  | 121.70 (14) | O40  | -C42 | -C431 | 122.5 (3)   |
| N3  | -C11 | -C12  | 106.82 (13) | C41  | -C42 | -C431 | 116.2 (2)   |
| C10 | -C11 | -C12  | 131.21 (15) | O40  | -C44 | -C45  | 123.0 (18)  |
| C11 | -C12 | -C13  | 108.32 (14) | O40  | -C44 | -C432 | 145 (2)     |
| C12 | -C13 | -C14  | 107.75 (14) | C45  | -C44 | -C432 | 91.9 (16)   |
| N3  | -C14 | -C15  | 122.81 (13) |      |      |       |             |
| C13 | -C14 | -C15  | 130.48 (14) | C52  | -C51 | -C53  | 117.6 (2)   |
| N3  | -C14 | -C13  | 106.65 (13) | O50  | -C51 | -C52  | 122.55 (17) |
| C14 | -C15 | -C16  | 109.87 (12) | O50  | -C51 | -C53  | 119.8 (2)   |
| C14 | -C15 | -C33  | 110.32 (13) |      |      |       |             |
|     |      |       |             |      |      |       |             |
| C4  | -N1  | -H1   | 124.5 (14)  | H281 | -C28 | -H282 | 106.0 (16)  |
| C1  | -N1  | -H1   | 124.6 (14)  | C10  | -C29 | -H291 | 106.5 (11)  |
| C6  | -N2  | -H2   | 126.1 (14)  | C10  | -C29 | -H292 | 110.5 (10)  |
| C9  | -N2  | -H2   | 122.9 (14)  | C30  | -C29 | -H291 | 108.8 (11)  |
| C14 | -N3  | -H3   | 125.5 (12)  | C30  | -C29 | -H292 | 108.3 (11)  |
| C11 | -N3  | -H3   | 124.1 (12)  | H291 | -C29 | -H292 | 107.1 (15)  |
| C19 | -N4  | -H4   | 124.8 (13)  | S3   | -C30 | -H301 | 107.5 (11)  |
| C16 | -N4  | -H4   | 124.0 (13)  | S3   | -C30 | -H302 | 105.5 (12)  |
| C1  | -C2  | -H21  | 125.8 (11)  | C29  | -C30 | -H301 | 111.2 (12)  |
| C3  | -C2  | -H21  | 126.1 (11)  | C29  | -C30 | -H302 | 110.7 (11)  |
| C2  | -C3  | -H31  | 126.0 (12)  | H301 | -C30 | -H302 | 108.6 (15)  |
| C4  | -C3  | -H31  | 126.4 (12)  | S3   | -C31 | -H311 | 104.8 (13)  |
| C6  | -C7  | -H71  | 124.9 (12)  | S3   | -C31 | -H312 | 108.7 (11)  |
| C8  | -C7  | -H71  | 127.1 (12)  | C32  | -C31 | -H311 | 110.0 (13)  |
| C7  | -C8  | -H81  | 127.4 (13)  | C32  | -C31 | -H312 | 111.1 (11)  |
| C9  | -C8  | -H81  | 124.7 (13)  | H311 | -C31 | -H312 | 109.5 (17)  |
| C11 | -C12 | -H121 | 126.3 (12)  | C10  | -C32 | -H321 | 107.3 (11)  |
| C13 | -C12 | -H121 | 125.4 (12)  | C10  | -C32 | -H322 | 108.9 (11)  |

**Table S6 (cont.)** - Bond Angles (Degrees) for **Compound 6**

|      |       |       |            |      |       |       |            |
|------|-------|-------|------------|------|-------|-------|------------|
| C12  | -C13  | -H131 | 125.3 (11) | C31  | -C32  | -H321 | 109.0 (11) |
| C14  | -C13  | -H131 | 126.9 (11) | C31  | -C32  | -H322 | 109.8 (11) |
| C16  | -C17  | -H171 | 125.9 (12) | H321 | -C32  | -H322 | 107.7 (15) |
| C18  | -C17  | -H171 | 126.2 (12) | C15  | -C33  | -H331 | 109.7 (10) |
| C17  | -C18  | -H181 | 127.5 (13) | C15  | -C33  | -H332 | 110.7 (10) |
| C19  | -C18  | -H181 | 124.7 (13) | C34  | -C33  | -H331 | 108.7 (10) |
| C20  | -C21  | -H211 | 107.2 (11) | C34  | -C33  | -H332 | 109.9 (10) |
| C20  | -C21  | -H212 | 109.3 (10) | H331 | -C33  | -H332 | 104.2 (14) |
| C22  | -C21  | -H211 | 109.7 (11) | S4   | -C34  | -H341 | 105.5 (11) |
| C22  | -C21  | -H212 | 110.1 (11) | S4   | -C34  | -H342 | 109.5 (11) |
| H211 | -C21  | -H212 | 105.1 (15) | C33  | -C34  | -H341 | 109.5 (11) |
| S1   | -C22  | -H221 | 109.6 (11) | C33  | -C34  | -H342 | 110.2 (11) |
| S1   | -C22  | -H222 | 103.6 (13) | H341 | -C34  | -H342 | 109.7 (16) |
| C21  | -C22  | -H221 | 110.8 (11) | S4   | -C35  | -H351 | 108.8 (12) |
| C21  | -C22  | -H222 | 111.1 (13) | S4   | -C35  | -H352 | 104.3 (13) |
| H221 | -C22  | -H222 | 107.7 (17) | C36  | -C35  | -H351 | 110.1 (11) |
| S1   | -C23  | -H231 | 104.5 (12) | C36  | -C35  | -H352 | 111.0 (13) |
| S1   | -C23  | -H232 | 107.4 (11) | H351 | -C35  | -H352 | 108.9 (17) |
| C24  | -C23  | -H231 | 110.3 (12) | C15  | -C36  | -H361 | 107.6 (10) |
| C24  | -C23  | -H232 | 111.2 (11) | C15  | -C36  | -H362 | 109.4 (11) |
| H231 | -C23  | -H232 | 109.9 (16) | C35  | -C36  | -H361 | 109.8 (10) |
| C20  | -C24  | -H241 | 108.8 (10) | C35  | -C36  | -H362 | 108.1 (11) |
| C20  | -C24  | -H242 | 108.6 (10) | H361 | -C36  | -H362 | 106.8 (16) |
| C23  | -C24  | -H241 | 110.3 (11) | C42  | -C41  | -H411 | 109.43     |
| C23  | -C24  | -H242 | 107.8 (10) | C42  | -C41  | -H412 | 109.48     |
| H241 | -C24  | -H242 | 107.5 (15) | C42  | -C41  | -H413 | 109.44     |
| C5   | -C25  | -H251 | 105.7 (11) | H411 | -C41  | -H412 | 109.49     |
| C5   | -C25  | -H252 | 109.3 (11) | H411 | -C41  | -H413 | 109.50     |
| C26  | -C25  | -H251 | 109.8 (11) | H412 | -C41  | -H413 | 109.48     |
| C26  | -C25  | -H252 | 109.4 (10) | C44  | -C45  | -H451 | 109.48     |
| H251 | -C25  | -H252 | 107.9 (15) | C44  | -C45  | -H452 | 109.52     |
| S2   | -C26  | -H261 | 109.7 (12) | C44  | -C45  | -H453 | 109.48     |
| S2   | -C26  | -H262 | 106.4 (12) | H451 | -C45  | -H452 | 109.55     |
| C25  | -C26  | -H261 | 110.5 (13) | H451 | -C45  | -H453 | 109.44     |
| C25  | -C26  | -H262 | 110.1 (12) | H452 | -C45  | -H453 | 109.36     |
| H261 | -C26  | -H262 | 106.4 (17) | C42  | -C431 | -H431 | 109.53     |
| S2   | -C27  | -H271 | 108.5 (12) | C42  | -C431 | -H432 | 109.45     |
| S2   | -C27  | -H272 | 104.4 (13) | C42  | -C431 | -H433 | 109.49     |
| C28  | -C27  | -H271 | 111.7 (12) | H431 | -C431 | -H432 | 109.47     |
| C28  | -C27  | -H272 | 111.1 (13) | H431 | -C431 | -H433 | 109.43     |
| H271 | -C27  | -H272 | 108.0 (17) | H432 | -C431 | -H433 | 109.47     |
| C5   | -C28  | -H281 | 109.8 (12) | C44  | -C432 | -H435 | 109.54     |
| C5   | -C28  | -H282 | 107.1 (11) | C44  | -C432 | -H436 | 109.55     |
| C27  | -C28  | -H281 | 109.1 (11) | H434 | -C432 | -H435 | 109.41     |
| C27  | -C28  | -H282 | 109.2 (11) |      |       |       |            |
| H434 | -C432 | -H436 | 109.38     |      |       |       |            |
| H435 | -C432 | -H436 | 109.50     |      |       |       |            |
| C51  | -C52  | -H523 | 109.46     |      |       |       |            |
| C51  | -C52  | -H521 | 109.49     |      |       |       |            |
| C51  | -C52  | -H522 | 109.47     |      |       |       |            |
| H522 | -C52  | -H523 | 109.50     |      |       |       |            |
| H521 | -C52  | -H522 | 109.42     |      |       |       |            |
| H521 | -C52  | -H523 | 109.48     |      |       |       |            |
| C51  | -C53  | -H531 | 109.47     |      |       |       |            |
| C51  | -C53  | -H532 | 109.46     |      |       |       |            |
| C51  | -C53  | -H533 | 109.41     |      |       |       |            |
| H531 | -C53  | -H533 | 109.55     |      |       |       |            |
| H532 | -C53  | -H533 | 109.46     |      |       |       |            |
| H531 | -C53  | -H532 | 109.48     |      |       |       |            |



## Spectra of the new compounds prepared

### <sup>1</sup>H NMR

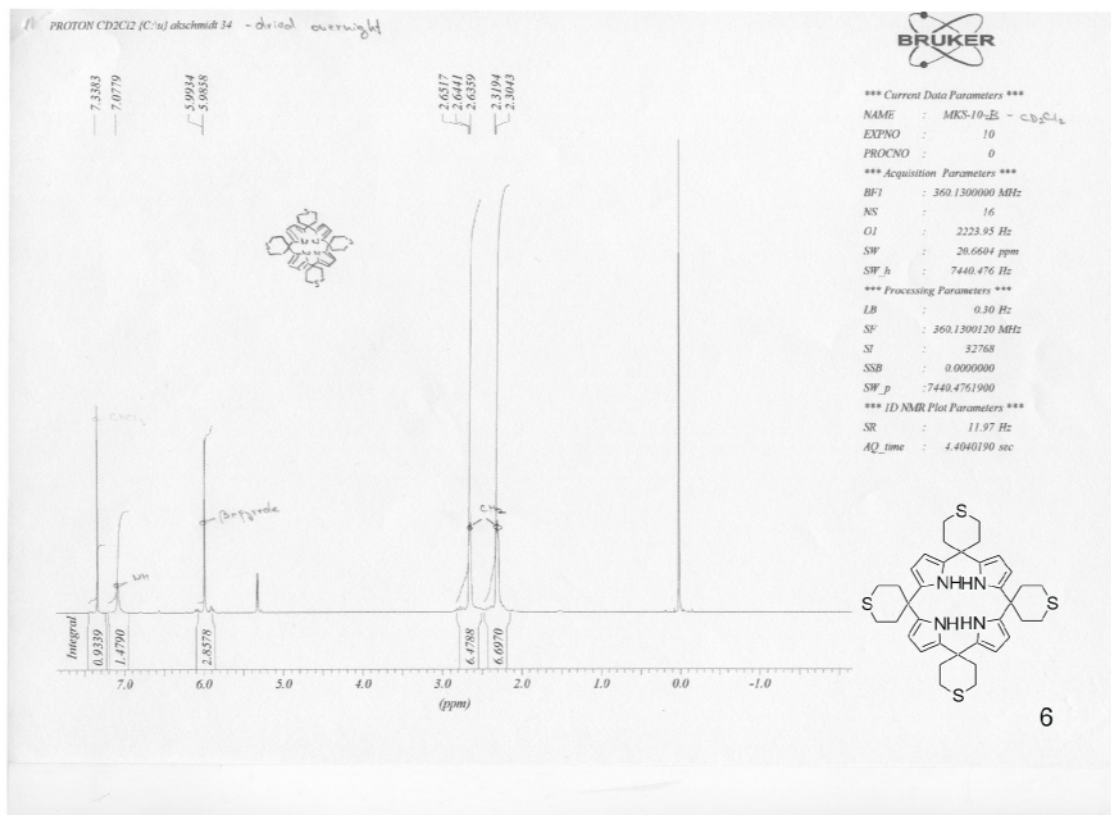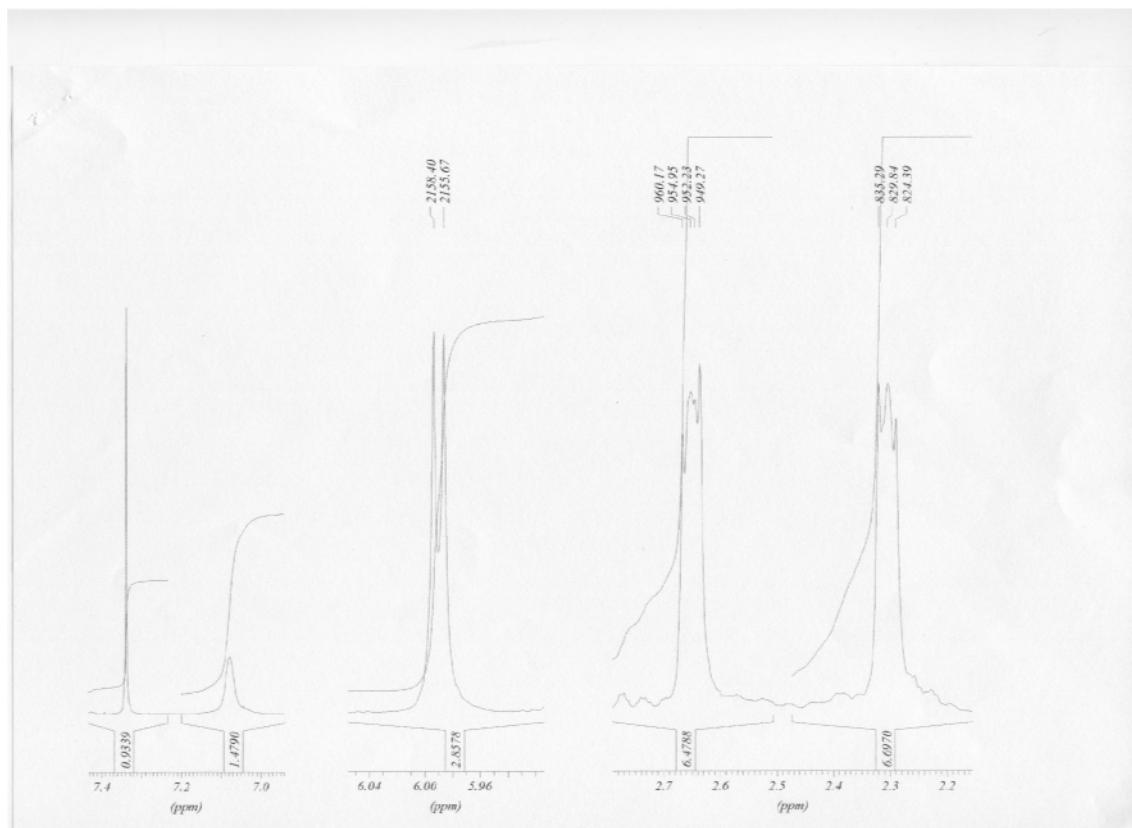

# $^{13}\text{C}$ carbon spectrum (DMSO)

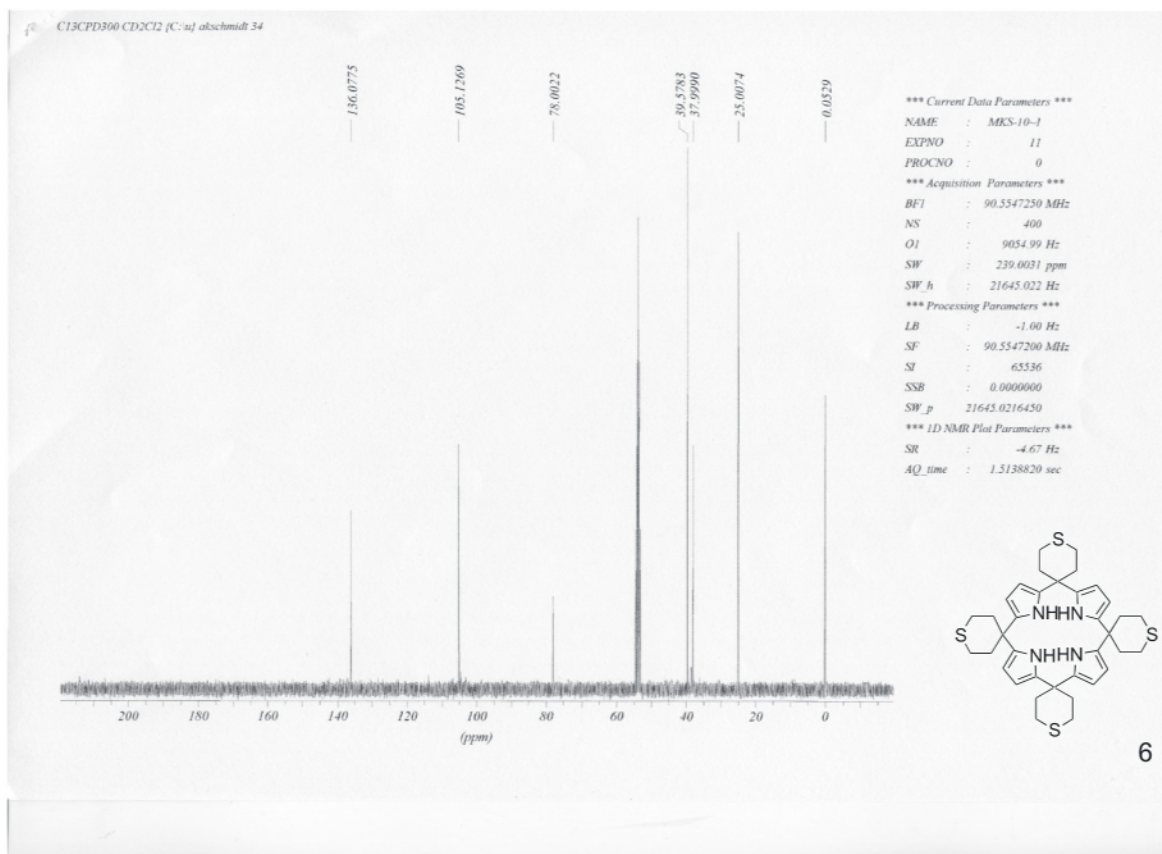

# DEPT 135 degree

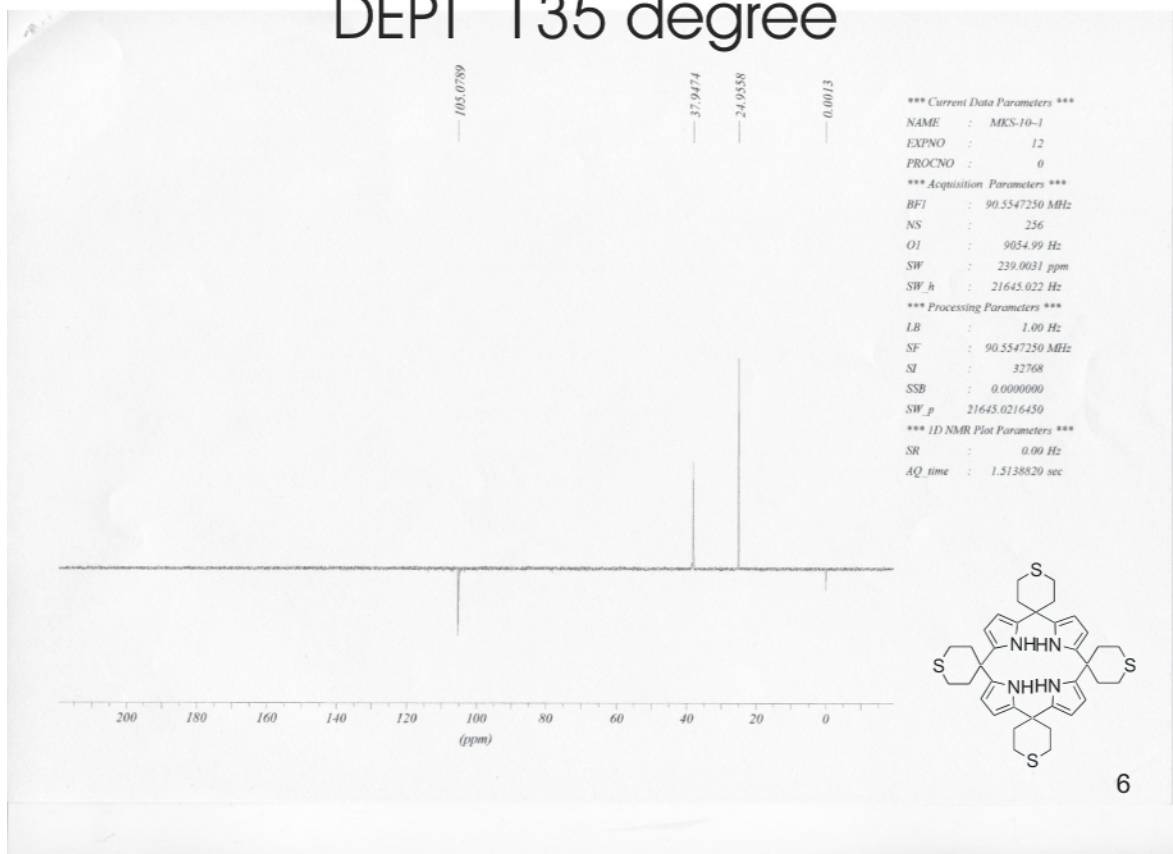

# Electro spray MS

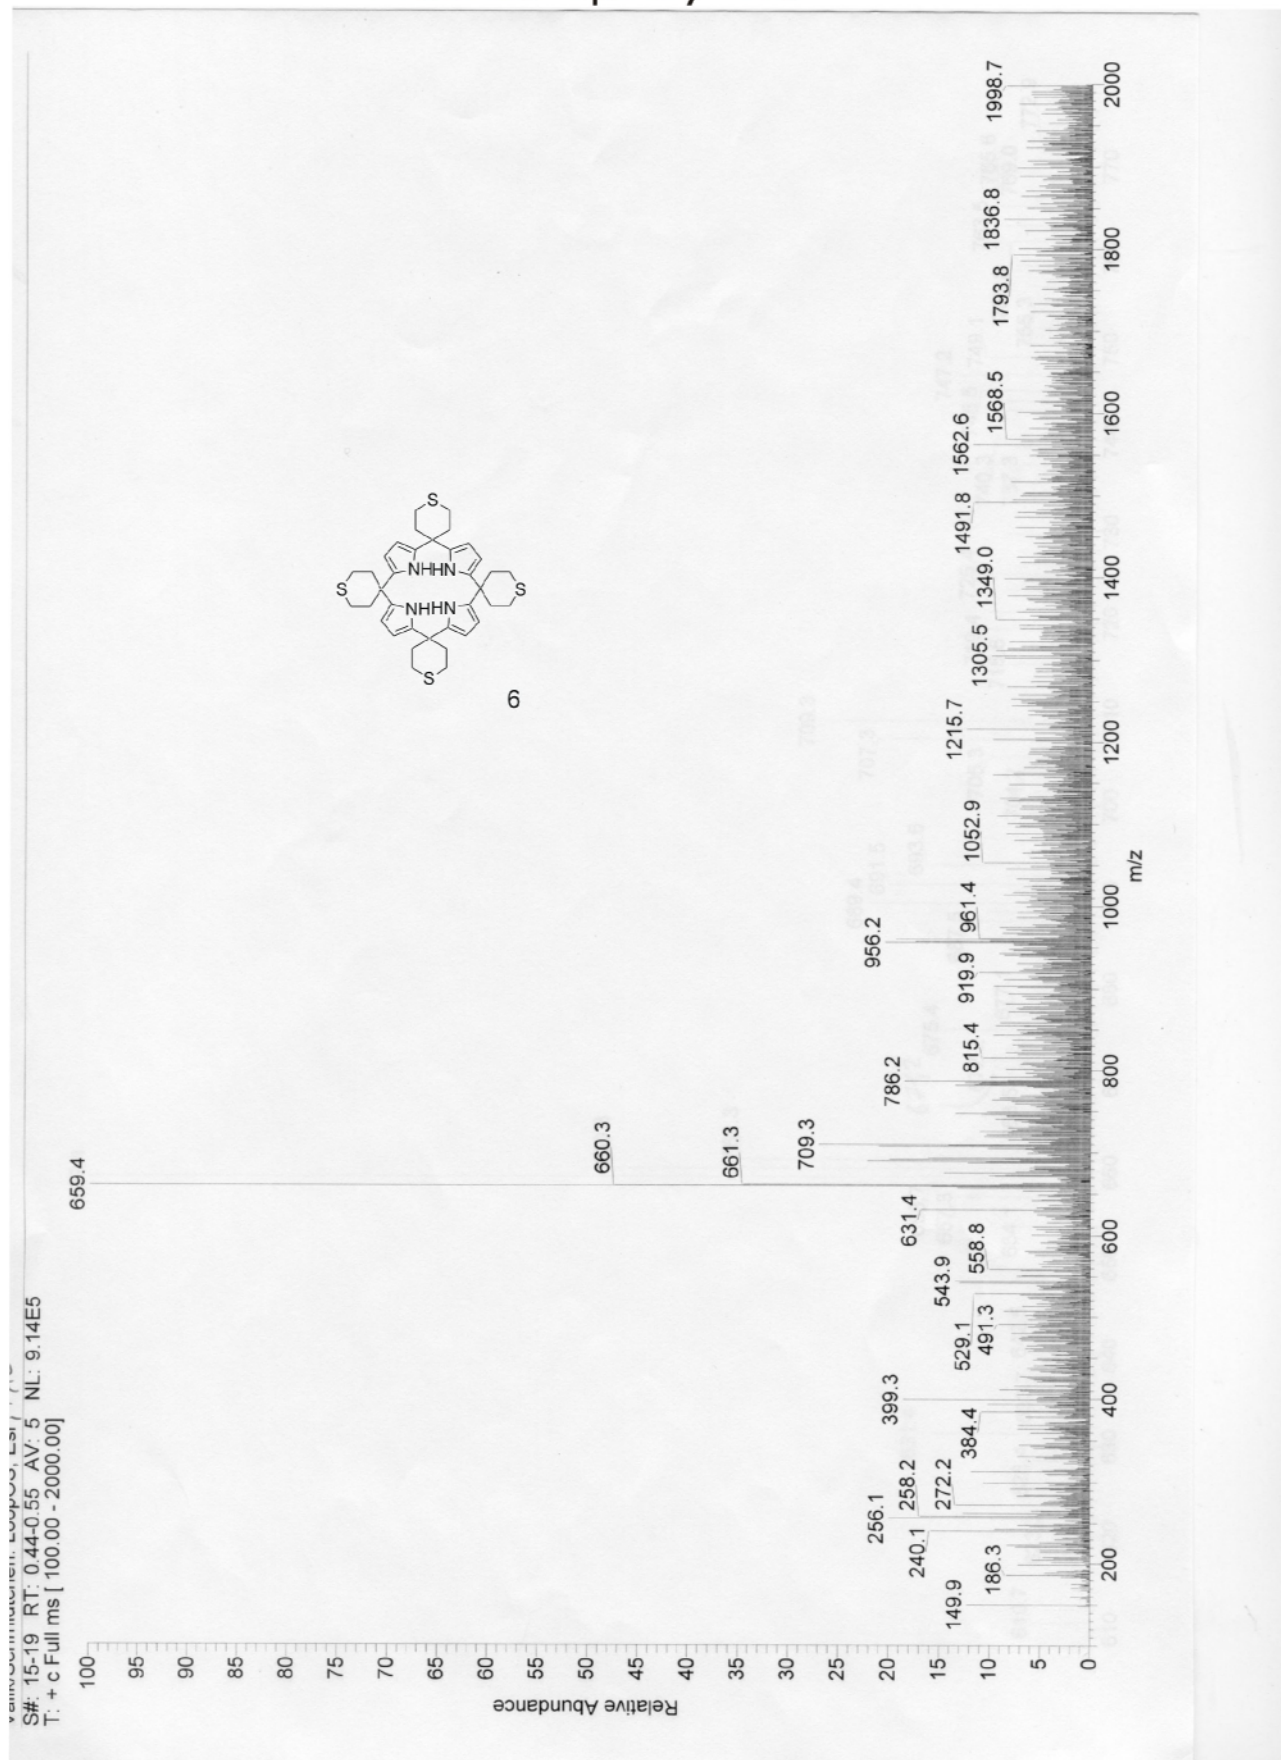

Supplement: b617465e.pdf [file b617465e.pdf]
