# Supplementary material for: Sulfoniumcalixpyrrole: the decoration of a calix[4]pyrrole host with positive charges boosts affinity and selectivity of anion binding in DMSO solvent
Source: Royal Society of Chemistry journal article supplement (doi:10.1039/b617465e), 2007-01-01

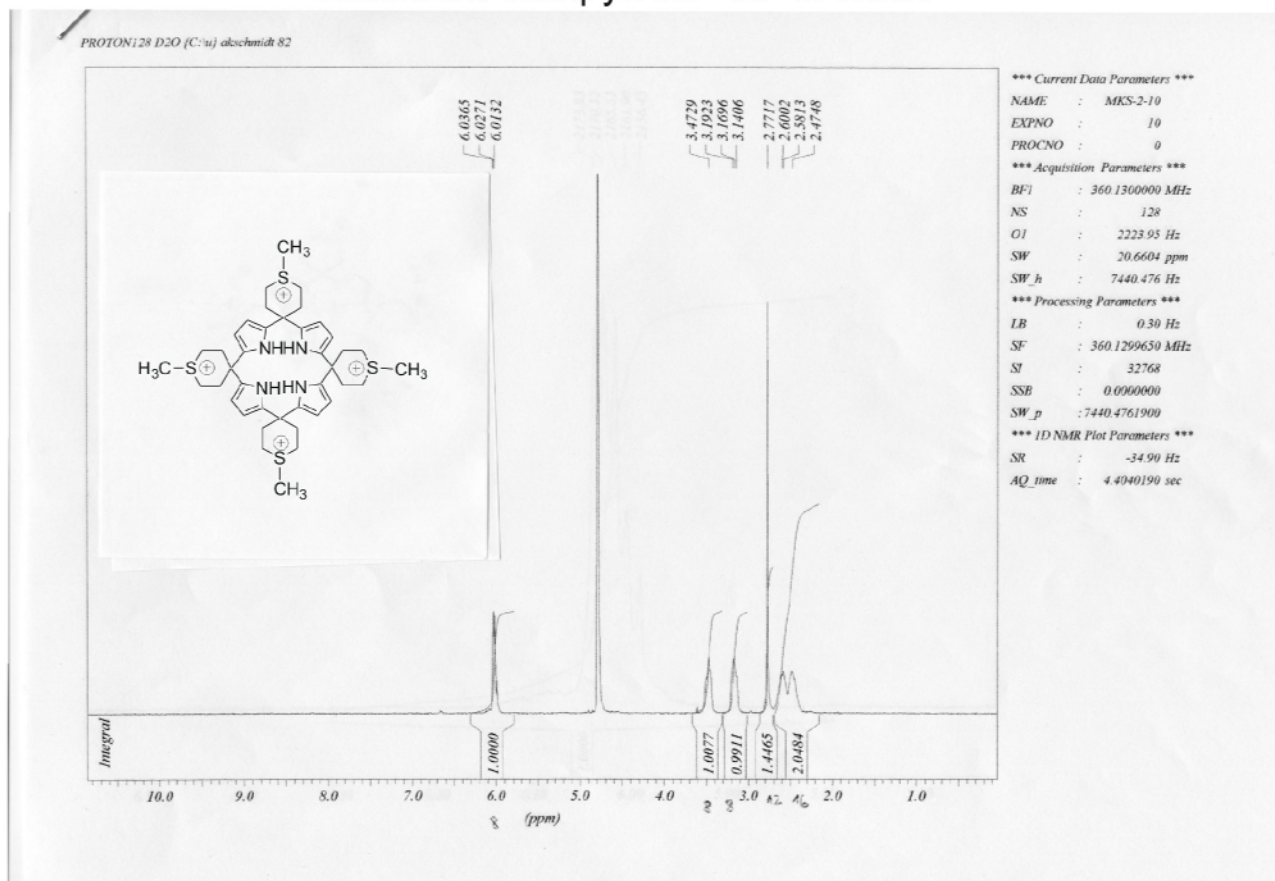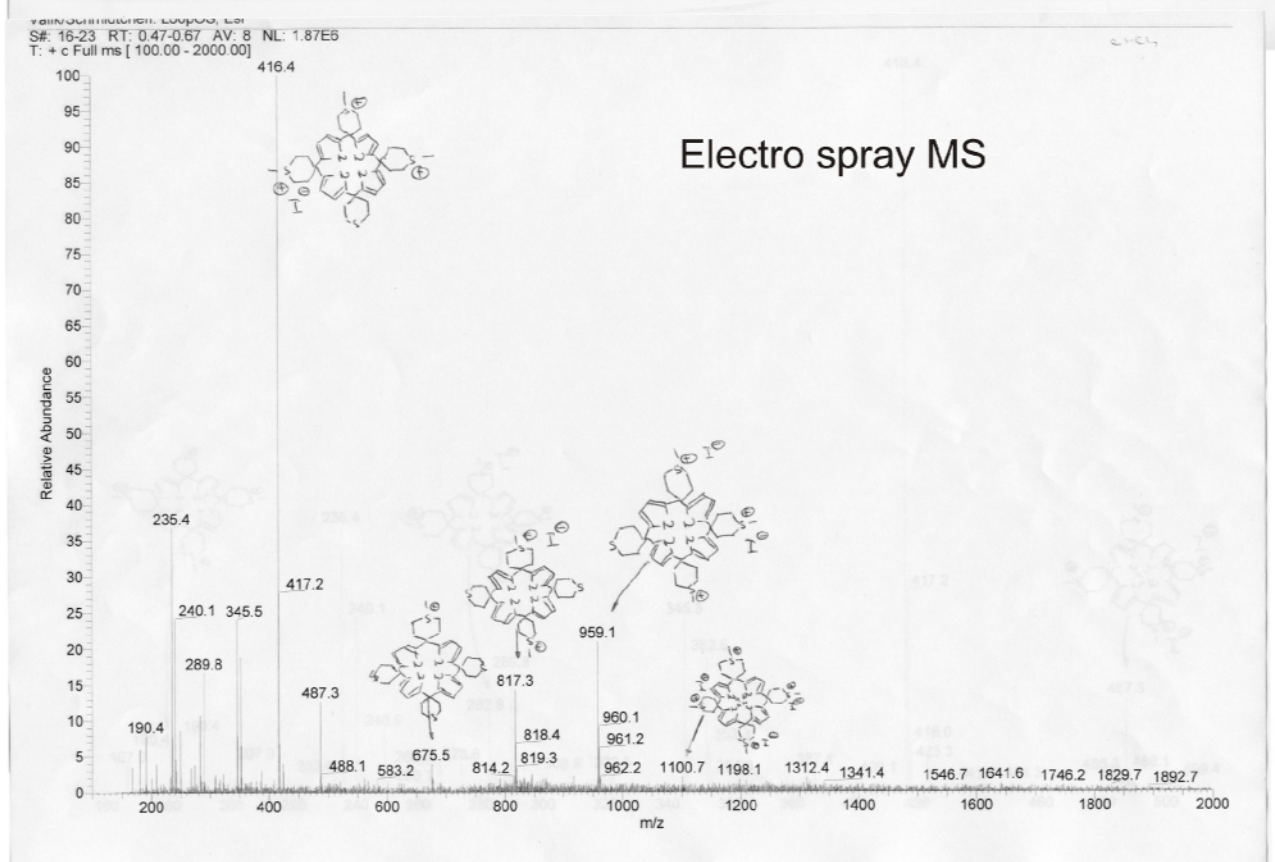

# ethoxycarbonylmethylsulfonium calixpyrrole **3b** in water

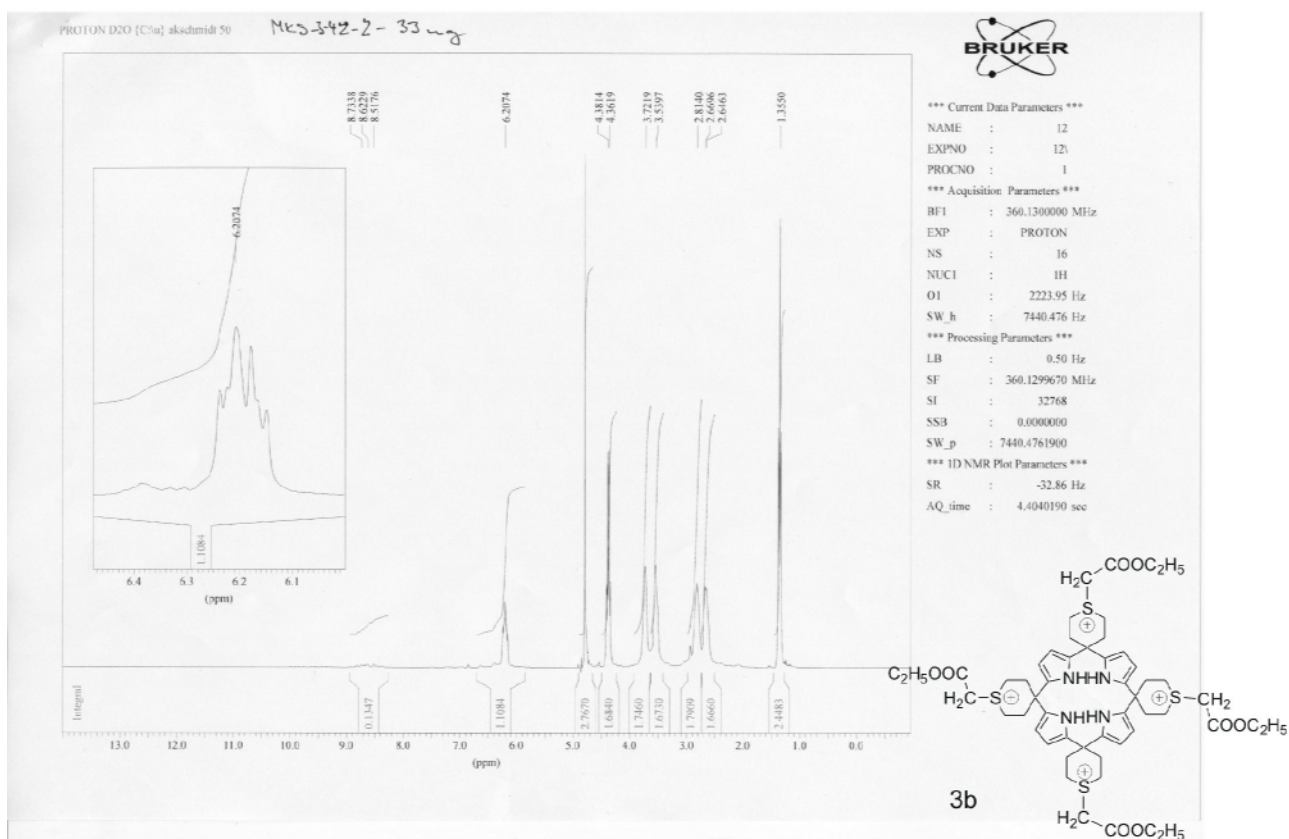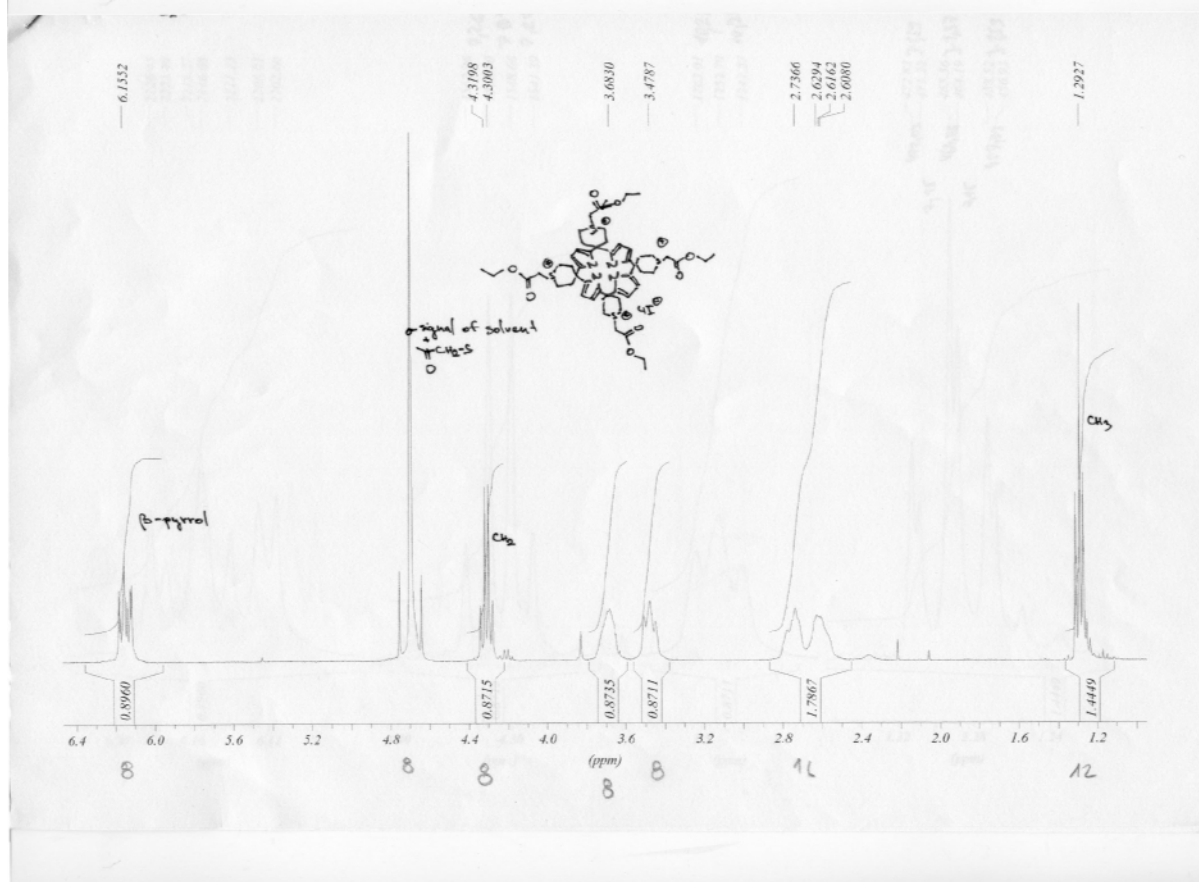

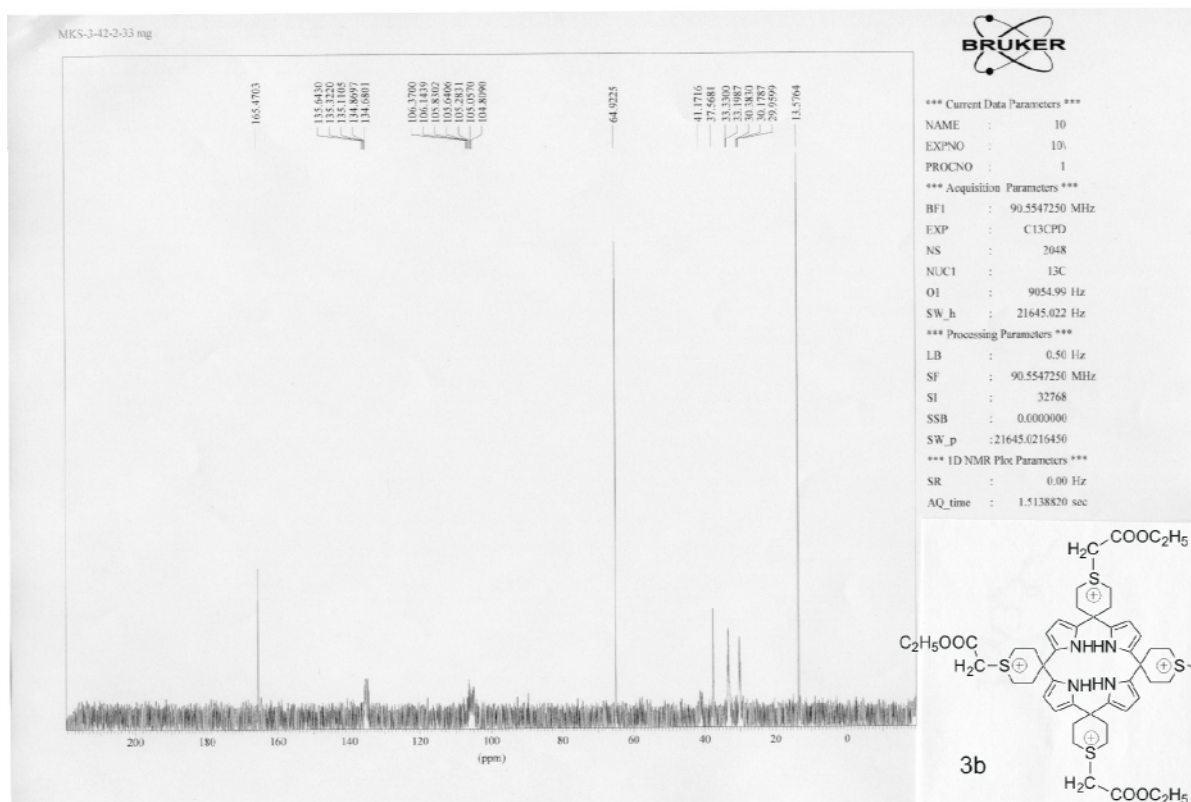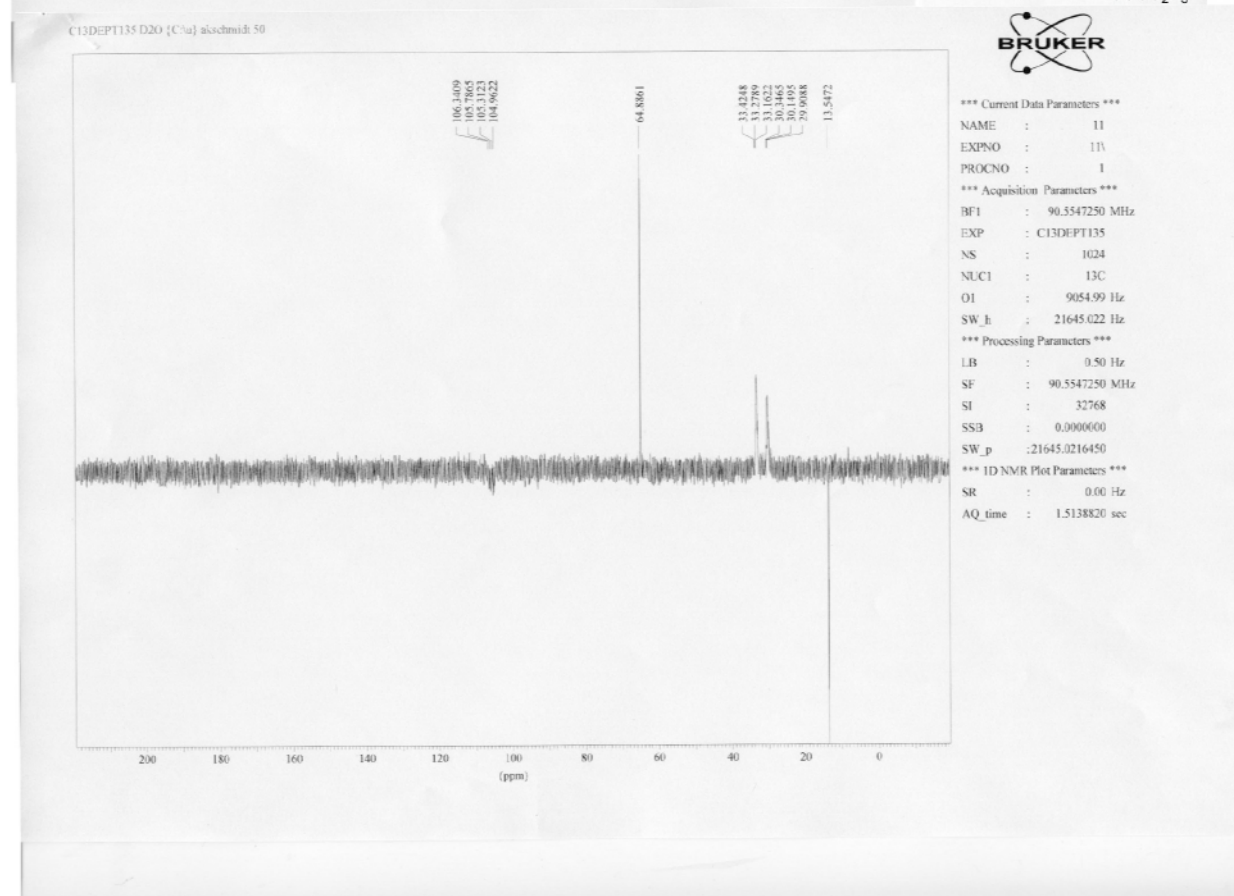

Supplementary Material (ESI) for New Journal of Chemistry  
 This journal is © The Royal Society of Chemistry and  
 The Centre National de la Recherche Scientifique, 2007  
**ESI-MS of ethoxycarbonylmethylsulfonium calixpyrrole 3b**

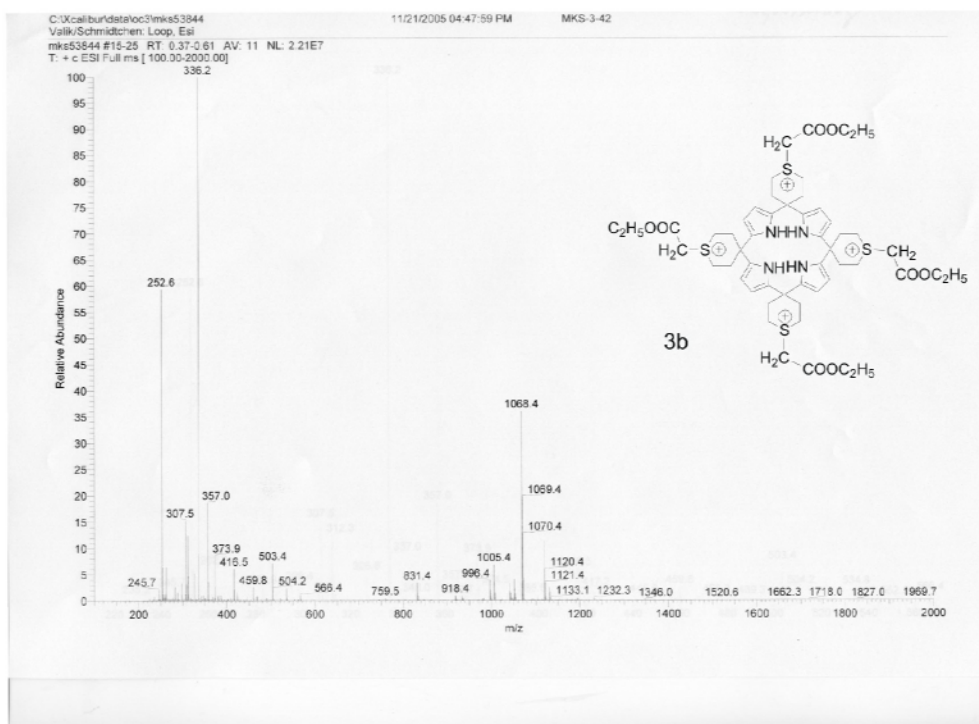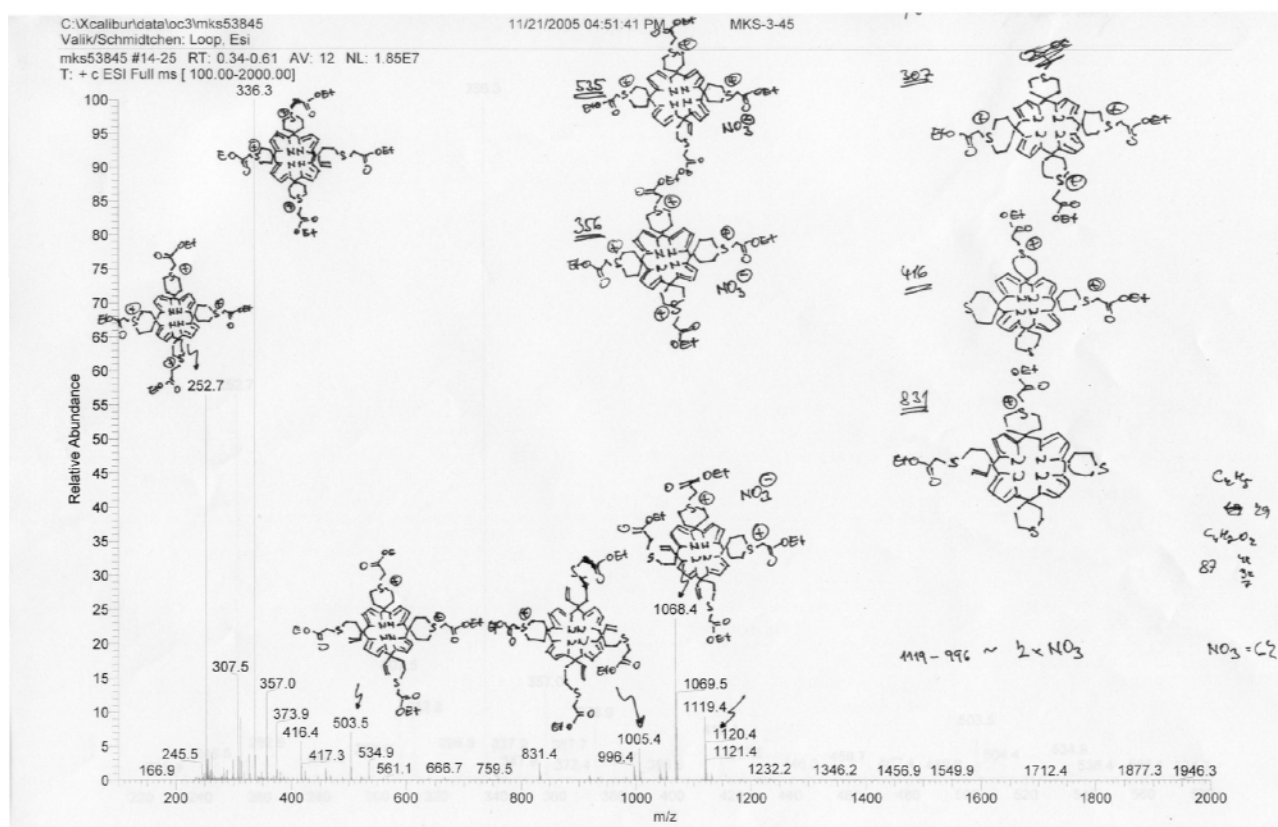

## ITC-titration curves with anions of table 2

### TEA benzoate

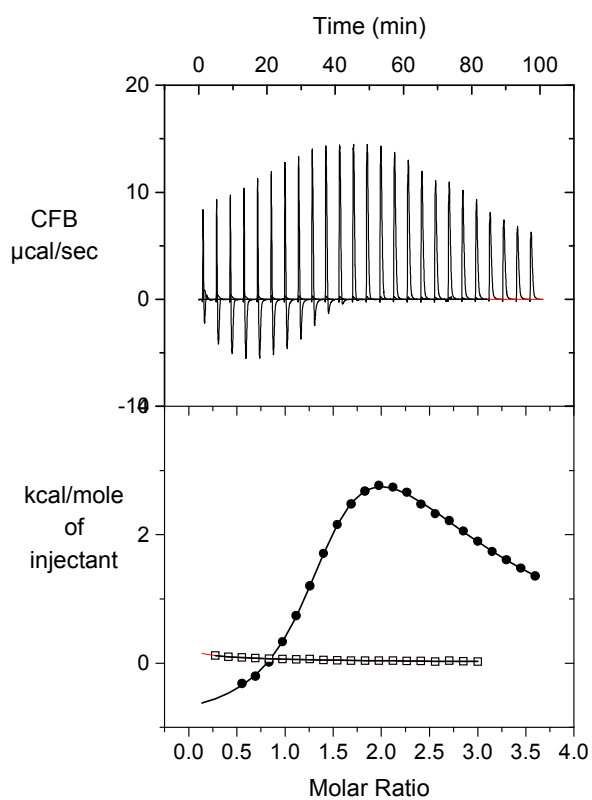

### Tea acetate

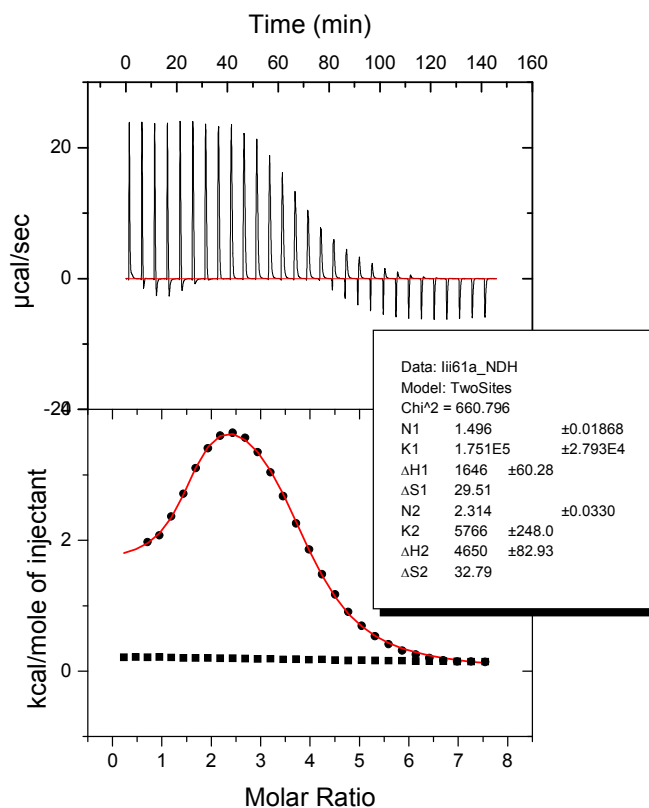

### TBA H<sub>2</sub>PO<sub>4</sub>

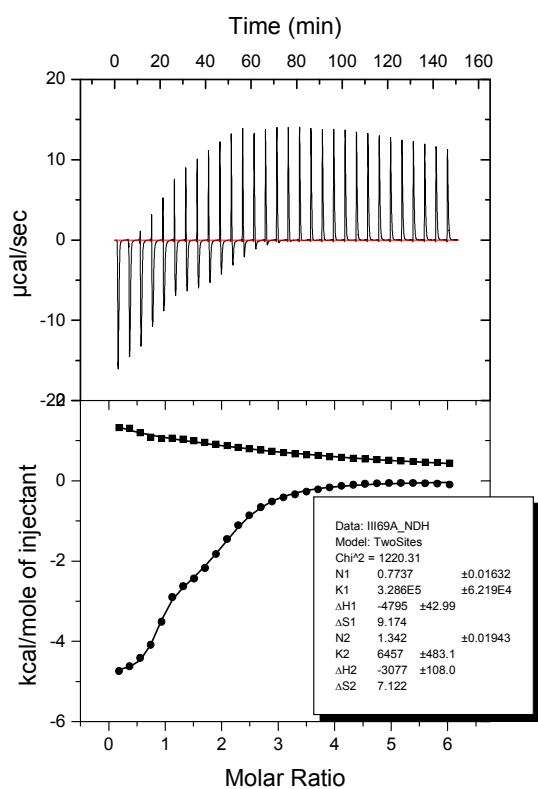

### TBA HSO<sub>4</sub>

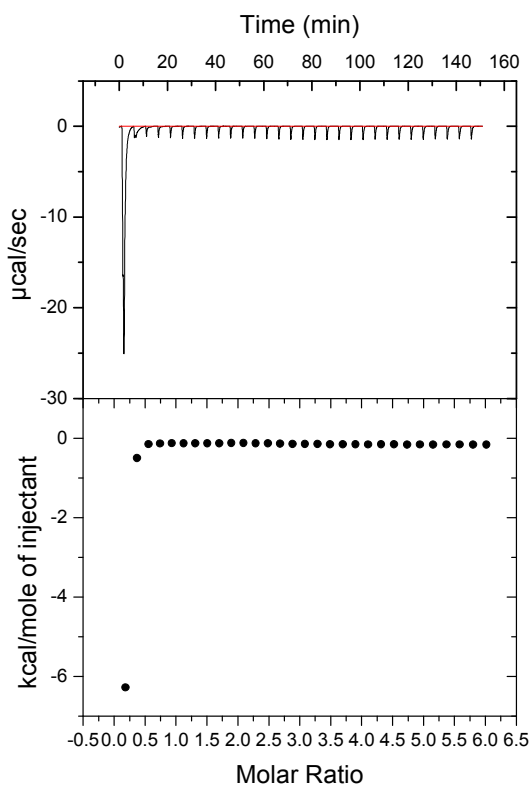

### ITC-titration curves with anions of table 3

#### TEA phthalate

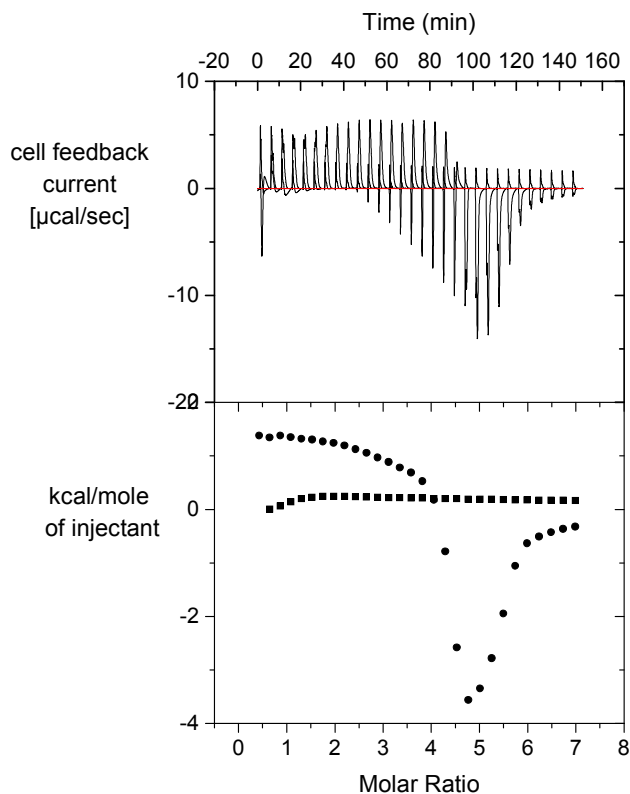

#### TEA isophthalate

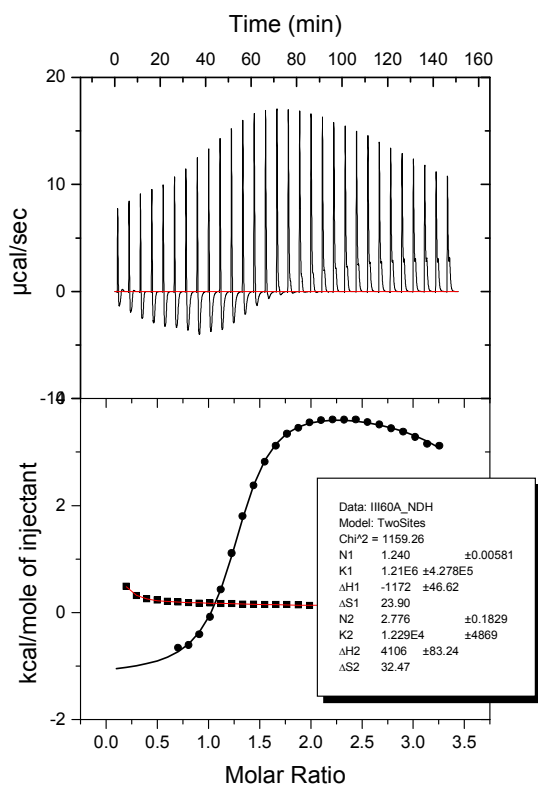

#### TEA terephthalate

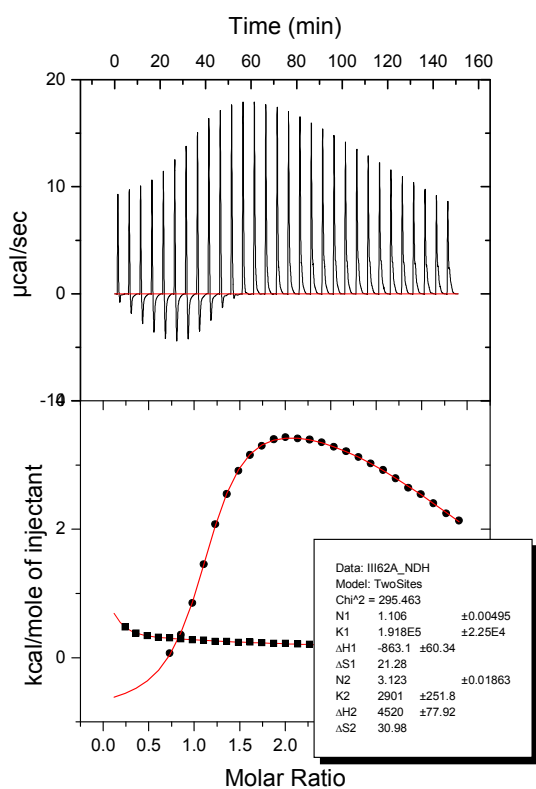

#### TEA p-carboxyvinylencinnamate

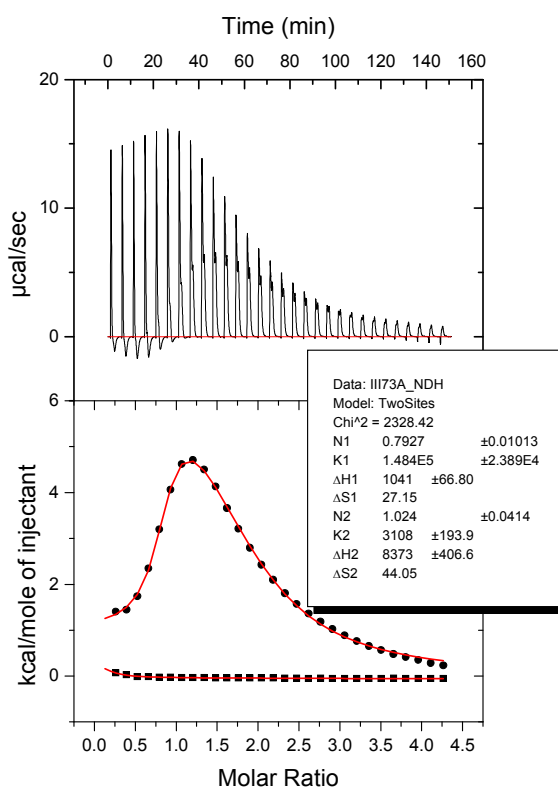

### TEA trans,trans-muconate

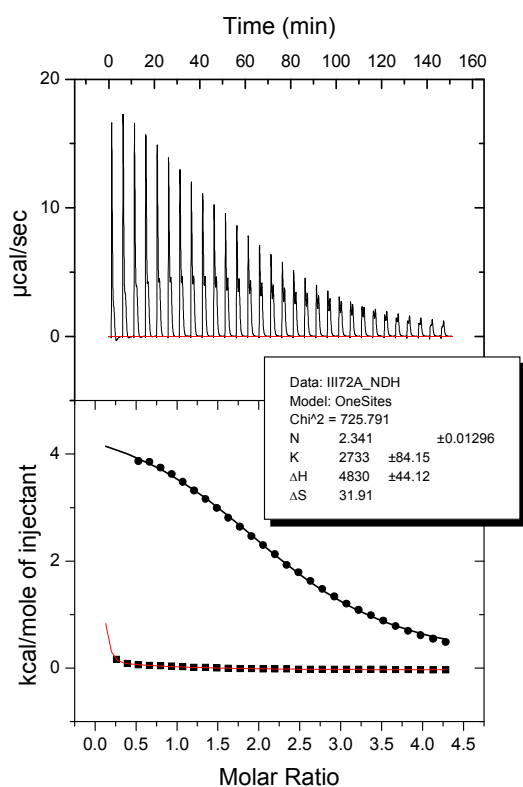

### TEA fumarate

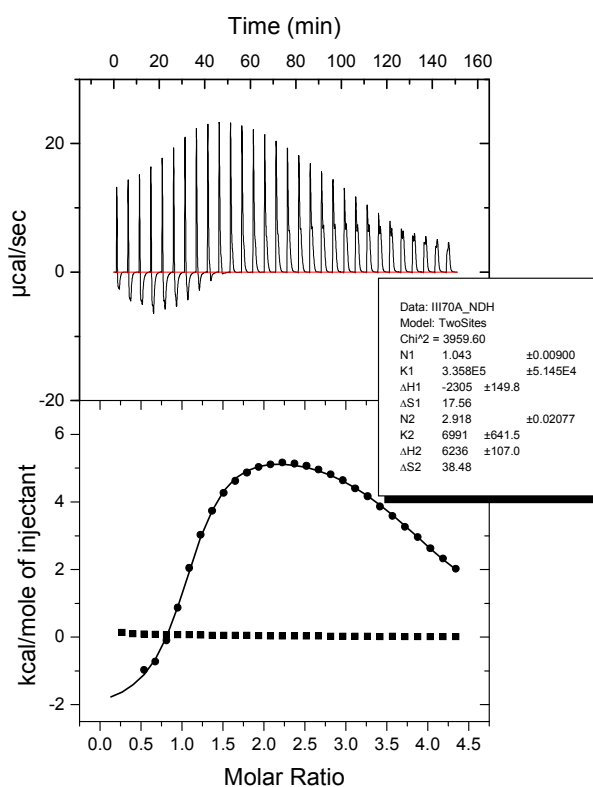

### TEA oxalate

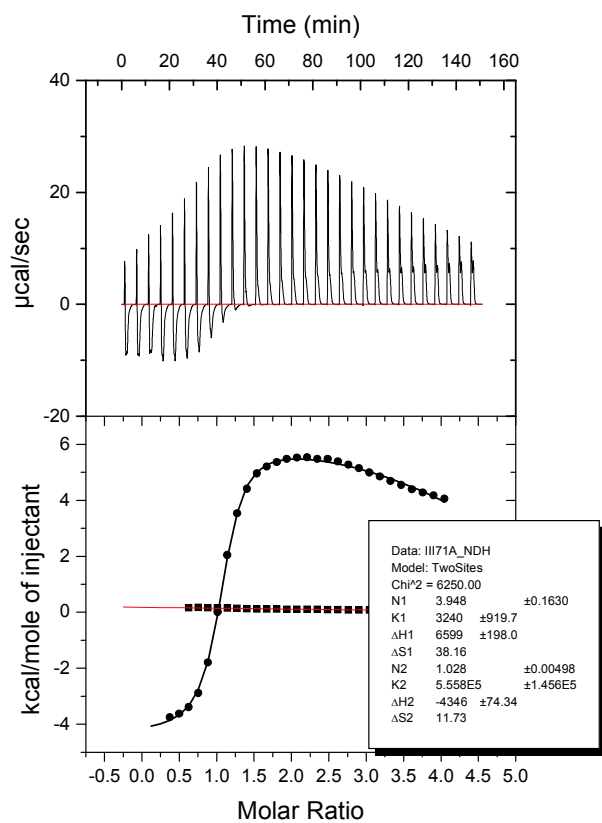

### TEA squarate

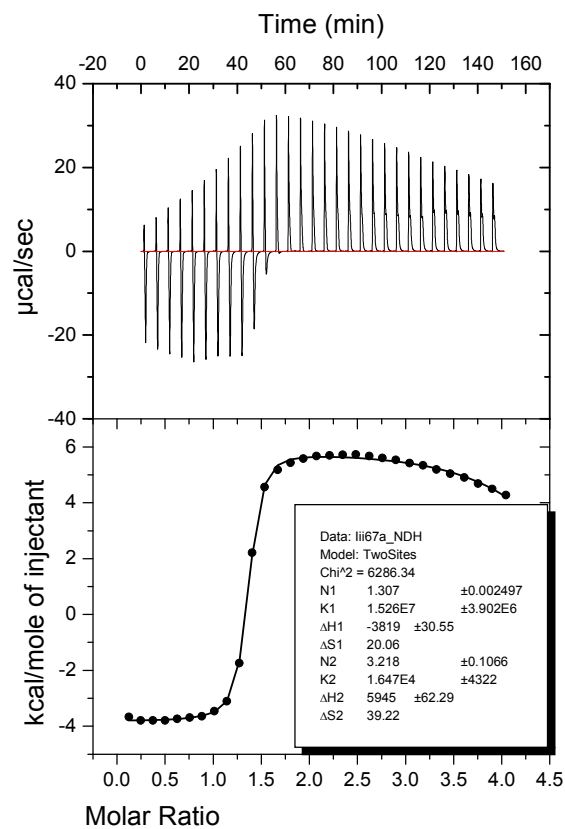

Supplement: b617465e1.pdf [file b617465e1.pdf]
